# Supplementary material for: Genome-wide DNA methylation association study of recent and cumulative marijuana use in middle aged adults
Source: Mol Psychiatry. 2023 May 31;28(6):2572–82. doi: 10.1038/s41380-023-02106-y (PMC10611566; doi:10.1038/s41380-023-02106-y)
Supplement: Supplementary file 2 — Supplemental Tables [file 41380_2023_2106_MOESM2_ESM.xlsx]

## Sheet: TableOfContents
SUPPLEMENTAL MATERIAL
Table	Title
Supplemental Table 1	Associated Recent and Cumulative Marijuana Use CpGs at Y15
Supplemental Table 2	Associated Recent and Cumulative Marijuana Use CpGs at Y20
Supplemental Table 3	Five-Year ΔMarijuana Use vs. ΔMethylation Analysis Among CpGs Identified at Y15
Supplemental Table 4	Five-Year ΔMarijuana Use vs. ΔMethylation Analysis Among CpGs Identified at Y20
Supplemental Table 5	Sex-Specific Associations for Recent and Cumulative Marijuana Use at Y15
Supplemental Table 6	Sex-Specific Associations for Recent and Cumulative Marijuana Use at Y20
Supplemental Table 7	Race-Specific Associations for Recent and Cumulative Marijuana Use at Y15
Supplemental Table 8	Race-Specific Associations for Recent and Cumulative Marijuana Use at Y20
Supplemental Table 9	Smoking Status-Specific Associations for Recent and Cumulative Marijuana Use at Y15
Supplemental Table 10	Smoking Status-Specific Associations for Recent and Cumulative Marijuana Use at Y20
Supplemental Table 11	Recent and Cumulative Marijuana Use Results at Y15 for Previously Identifed CpGs
Supplemental Table 12	Recent and Cumulative Marijuana Use Results at Y20 for Previously Identifed CpGs
Supplemental Table 13	cis-meQTL Associations for Recent and Cumulative Marijuana Use at Y15
Supplemental Table 14	cis-meQTL Associations for Recent and Cumulative Marijuana Use at Y20
Supplemental Table 15	Significant cis-meQTL mapped to GWAS catalog traits
Supplemental Table 16	Differentially Methylated Regions for Recent Marijuana Use at Y15
Supplemental Table 17	Differentially Methylated Regions for Cumulative Marijuana Use at Y15
Supplemental Table 18	Differentially Methylated Regions for Recent Marijuana Use at Y20
Supplemental Table 19	Differentially Methylated Regions for Cumulative Marijuana Use at Y20

## Sheet: SuppTable1
Supplemental Table 1. Associated Recent and Cumulative Marijuana Use CpGs at Y15
CpG	Chr	Position	Nearest Gene	Genomic Region	Relation to CpG Island	Marijuana Use	Y15			Y20
							β (SE)	P	FDR	β (SE)	P	FDR
cg18110140	chr15	75350380			Open Sea	Recent Use	-1.10E-02 (1.90E-03)	7.39e-09	0.00325935	-5.59E-03 (2.09E-03)	0.00757272	0.391752
cg21171274	chr15	52539081	MYO5C	Body	Open Sea	Recent Use	-3.81E-03 (6.60E-04)	7.7e-09	0.00325935	-1.27E-03 (8.96E-04)	0.157861	0.780419
cg17218147	chr3	38995416	SCN11A	TSS1500	Open Sea	Recent Use	-5.11E-03 (9.09E-04)	1.88e-08	0.00526335	-1.21E-03 (1.58E-03)	0.442261	0.914307
cg12438576	chr11	89232216	NOX4	5'UTR	Open Sea	Recent Use	8.91E-03 (1.61E-03)	3.28e-08	0.00690007	5.69E-03 (2.43E-03)	0.0190068	0.492662
cg15627771	chr2	192111084	MYO1B	5'UTR	Shore	Recent Use	-4.91E-03 (9.21E-04)	9.5e-08	0.0141814	-1.60E-03 (1.66E-03)	0.334957	0.880148
cg18880190	chr15	40399609	BMF	5'UTR	Shore	Recent Use	-5.01E-03 (9.41E-04)	1.011e-07	0.0141814	-3.56E-03 (1.38E-03)	0.0100606	0.422165
cg19857151	chr1	235985454	LYST	Body	Open Sea	Recent Use	5.66E-03 (1.09E-03)	1.907e-07	0.0229339	8.49E-04 (2.38E-03)	0.721379	0.969411
cg13444775	chr11	124546591	SIAE;SPA17	TSS1500	Shelf	Recent Use	-1.29E-02 (2.50E-03)	2.304e-07	0.0242407	-4.25E-03 (2.72E-03)	0.118536	0.739061
cg05575921	chr5	373378	AHRR	Body	Shore	Recent Use	-3.37E-02 (6.61E-03)	3.382e-07	0.0277246	-3.41E-02 (5.77E-03)	3.57239e-09	0.00150333
cg15607642	chr6	107391589	BEND3	Body	Shore	Recent Use	5.62E-03 (1.10E-03)	3.574e-07	0.0277246	1.57E-03 (1.95E-03)	0.420982	0.908333
cg10721491	chr19	29581832			Shelf	Recent Use	-5.43E-03 (1.07E-03)	3.624e-07	0.0277246	-4.56E-04 (1.54E-03)	0.767563	0.975808
cg05161803	chr6	12393258	RNU6-48P	TSS1500	Open Sea	Recent Use	-6.76E-03 (1.34E-03)	4.552e-07	0.0317146	-8.03E-04 (1.56E-03)	0.607404	0.950877
cg05086879	chr22	39861490	MGAT3	5'UTR	Open Sea	Recent Use	-1.10E-02 (2.19E-03)	4.899e-07	0.0317146	-1.08E-02 (2.85E-03)	0.000161643	0.132554
cg06300152	chr1	150268771	MRPS21	Body	Shelf	Recent Use	5.97E-03 (1.19E-03)	5.623e-07	0.0318086	-6.95E-05 (1.42E-03)	0.961083	0.996725
cg19856593	chr21	38064236			Shore	Recent Use	-6.92E-03 (1.39E-03)	5.875e-07	0.0318086	-2.39E-03 (2.99E-03)	0.423325	0.908849
cg05615552	chr6	33160952	COL11A2	TSS1500	Island	Recent Use	5.85E-03 (1.17E-03)	6.047e-07	0.0318086	4.37E-04 (1.78E-03)	0.806391	0.980848
cg16947168	chr3	62651287	CADPS	Body	Open Sea	Recent Use	-8.63E-03 (1.74E-03)	6.873e-07	0.0322612	-1.70E-03 (1.86E-03)	0.361392	0.889694
cg05009104	chr7	45002980	MYO1G	Body	Shore	Recent Use	1.41E-02 (2.84E-03)	7.126e-07	0.0322612	9.51E-03 (3.26E-03)	0.00350266	0.318259
cg15802887	chr1	32420496			Open Sea	Recent Use	-3.42E-03 (6.91E-04)	7.283e-07	0.0322612	-5.68E-04 (9.95E-04)	0.568308	0.943182
cg25189904	chr1	68299493	GNG12	TSS1500	Shore	Recent Use	-1.60E-02 (3.26E-03)	9.37e-07	0.0390317	-1.42E-02 (3.60E-03)	7.72593e-05	0.100734
cg23932689	chr12	110173904	FAM222A	5'UTR	Open Sea	Recent Use	5.97E-03 (1.22E-03)	9.739e-07	0.0390317	2.78E-03 (1.75E-03)	0.112841	0.731931
cg12475321	chr3	34711184			Open Sea	Recent Use	-6.69E-03 (1.37E-03)	1.1163e-06	0.0427038	-1.02E-03 (2.09E-03)	0.625571	0.953782
cg05575921	chr5	373378	AHRR	Body	Shore	Cumulative Use	-8.51E-02 (1.40E-02)	1.18e-09	0.000993141	-6.94E-02 (1.19E-02)	5e-09	0.00420828
cg18880190	chr15	40399609	BMF	5'UTR	Shore	Cumulative Use	-1.30E-02 (2.32E-03)	2e-08	0.00839825	-7.80E-03 (2.43E-03)	0.00132478	0.324785
cg07064251	chr2	43948676	PLEKHH2	Body	Open Sea	Cumulative Use	1.26E-02 (2.33E-03)	6.89e-08	0.0132363	6.45E-05 (2.96E-03)	0.982632	0.998947
cg23932689	chr12	110173904	FAM222A	5'UTR	Open Sea	Cumulative Use	1.52E-02 (2.83E-03)	7.95e-08	0.0132363	6.17E-03 (3.15E-03)	0.0502225	0.701359
cg25189904	chr1	68299493	GNG12	TSS1500	Shore	Cumulative Use	-3.81E-02 (7.11E-03)	8.16e-08	0.0132363	-2.53E-02 (5.94E-03)	2.01279e-05	0.127268
cg13179084	chr12	116638602	MED13L	Body	Open Sea	Cumulative Use	1.34E-02 (2.52E-03)	9.46e-08	0.0132363	2.88E-03 (2.86E-03)	0.314632	0.910644
cg06326914	chr15	35280920	ZNF770	TSS1500	Shore	Cumulative Use	1.73E-02 (3.26E-03)	1.101e-07	0.0132363	-9.46E-04 (3.16E-03)	0.76461	0.98367
cg12510044	chr22	22115473	MAPK1	3'UTR	Open Sea	Cumulative Use	-1.40E-02 (2.69E-03)	1.82e-07	0.0178841	-5.38E-03 (2.75E-03)	0.0501409	0.701097
cg18387338	chr7	26591438			Open Sea	Cumulative Use	-2.01E-02 (3.86E-03)	2.083e-07	0.0178841	-6.71E-04 (4.21E-03)	0.873462	0.992067
cg04742550	chr16	31366429	ITGAX	TSS200	Open Sea	Cumulative Use	-2.98E-02 (5.75E-03)	2.125e-07	0.0178841	-1.78E-02 (6.13E-03)	0.00372099	0.415702
cg09706133	chr15	68659758	ITGA11	Body	Open Sea	Cumulative Use	-1.07E-02 (2.08E-03)	2.963e-07	0.0208798	-4.42E-03 (2.19E-03)	0.0435251	0.684463
cg26764244	chr1	68299511	GNG12	TSS1500	Shore	Cumulative Use	-4.47E-02 (8.72E-03)	2.977e-07	0.0208798	-2.83E-02 (6.98E-03)	5.03696e-05	0.156579
cg09935388	chr1	92947588	GFI1	Body	Island	Cumulative Use	-3.94E-02 (7.74E-03)	3.644e-07	0.0214475	-1.44E-02 (8.27E-03)	0.0824224	0.762048
cg05009104	chr7	45002980	MYO1G	Body	Shore	Cumulative Use	3.48E-02 (6.84E-03)	3.701e-07	0.0214475	1.85E-02 (5.40E-03)	0.000616775	0.266703
cg03905975	chr8	128637338			Open Sea	Cumulative Use	-1.72E-02 (3.39E-03)	3.822e-07	0.0214475	-2.09E-04 (3.23E-03)	0.948432	0.996823
cg04864586	chr4	99853099	EIF4E	TSS1500	Shelf	Cumulative Use	1.35E-02 (2.67E-03)	4.1e-07	0.0215648	4.72E-03 (1.81E-03)	0.00920987	0.502338
cg03802952	chr2	45411645	LINC01121	Body	Open Sea	Cumulative Use	-1.89E-02 (3.75E-03)	4.429e-07	0.0219251	-5.85E-03 (3.75E-03)	0.118757	0.804793
cg01212491	chr10	75587308	CAMK2G	Body	Open Sea	Cumulative Use	-1.57E-02 (3.12E-03)	4.859e-07	0.0220455	-7.41E-03 (2.73E-03)	0.00657376	0.470751
cg15607642	chr6	107391589	BEND3	Body	Shore	Cumulative Use	1.27E-02 (2.52E-03)	4.977e-07	0.0220455	-5.09E-04 (3.51E-03)	0.88455	0.992921
cg27168438	chr3	28283068	CMC1	TSS200	Island	Cumulative Use	1.32E-02 (2.64E-03)	5.889e-07	0.0247828	5.60E-03 (3.03E-03)	0.0641257	0.730276
cg12211703	chr3	42204097	TRAK1	Body	Open Sea	Cumulative Use	8.91E-03 (1.79E-03)	6.849e-07	0.0274496	7.28E-04 (1.71E-03)	0.66947	0.974336
cg16736717	chr7	54397759	LINC01445	TSS1500	Open Sea	Cumulative Use	1.62E-02 (3.32E-03)	1.0322e-06	0.0394872	-3.90E-04 (4.32E-03)	0.928113	0.995674
cg14374923	chr6	33145955	COL11A2	Body	Open Sea	Cumulative Use	-1.40E-02 (2.88E-03)	1.2355e-06	0.0432695	-3.19E-03 (3.78E-03)	0.398375	0.931838
cg05998850	chr2	216981107	XRCC5	Body	Open Sea	Cumulative Use	1.46E-02 (3.01E-03)	1.2487e-06	0.0432695	3.70E-03 (3.38E-03)	0.274079	0.897264
cg19089201	chr7	45002287	MYO1G	3'UTR	Island	Cumulative Use	7.74E-02 (1.60E-02)	1.3209e-06	0.0432695	5.09E-02 (1.44E-02)	0.000415328	0.238768
cg20207973	chr22	38506712	BAIAP2L2	TSS200	Open Sea	Cumulative Use	-1.48E-02 (3.06E-03)	1.4013e-06	0.0432695	-5.35E-03 (3.72E-03)	0.150858	0.832059
cg26286198	chr20	48812659			Shelf	Cumulative Use	-1.07E-02 (2.22E-03)	1.4547e-06	0.0432695	-3.74E-04 (2.10E-03)	0.858979	0.991128
cg13810485	chr5	58440035	PDE4D	Body	Open Sea	Cumulative Use	-1.60E-02 (3.32E-03)	1.4584e-06	0.0432695	-8.34E-03 (3.44E-03)	0.0151921	0.559201
cg06681167	chr2	67828263			Open Sea	Cumulative Use	-1.16E-02 (2.41E-03)	1.5363e-06	0.0432695	1.52E-04 (2.44E-03)	0.95029	0.996968
cg18110140	chr15	75350380			Open Sea	Cumulative Use	-2.16E-02 (4.50E-03)	1.5423e-06	0.0432695	-1.33E-02 (3.56E-03)	0.000194977	0.198933
cg21852554	chr7	75993585			Open Sea	Cumulative Use	-1.12E-02 (2.35E-03)	1.6777e-06	0.0455498	-3.30E-03 (2.21E-03)	0.134679	0.819113

## Sheet: SuppTable2
Supplemental Table 2. Associated Recent and Cumulative Marijuana Use CpGs at Y20
CpG	Chr	Position	Nearest Gene	Genomic Region	Relation to CpG Island	Marijuana Use	Y15			Y20
							β (SE)	P	FDR	β (SE)	P	FDR
cg21161138	chr5	399360	AHRR	Body	Open Sea	Recent Use	-9.22E-03 (3.12E-03)	0.00311881	0.536959	-1.23E-02 (1.95E-03)	3.32697e-10	0.000280011
cg05575921	chr5	373378	AHRR	Body	Shore	Recent Use	-3.37E-02 (6.61E-03)	3.382e-07	0.0277246	-3.41E-02 (5.77E-03)	3.57239e-09	0.00150333
cg06581729	chr2	29004756	PPP1CB	Body	Open Sea	Recent Use	4.11E-05 (1.54E-03)	0.97867	0.999279	7.74E-03 (1.35E-03)	9.61302e-09	0.0026969
cg26867465	chr3	119399324			Shelf	Recent Use	4.03E-03 (1.67E-03)	0.0156628	0.687001	8.70E-03 (1.53E-03)	1.39779e-08	0.00294108
cg01372788	chr12	124122424	GTF2H3	5'UTR	Shelf	Recent Use	1.04E-03 (1.21E-03)	0.390261	0.953532	5.29E-03 (9.63E-04)	3.84321e-08	0.0064692
cg19569686	chr19	1555141	MEX3D	3'UTR	Island	Recent Use	1.18E-03 (2.56E-03)	0.646093	0.981446	1.19E-02 (2.22E-03)	7.89125e-08	0.00925421
cg17456749	chr12	111807011	FAM109A	TSS200	Island	Recent Use	-1.58E-03 (1.19E-03)	0.183872	0.90299	-6.20E-03 (1.16E-03)	8.06034e-08	0.00925421
cg00761236	chr13	107305783	LINC00443	TSS1500	Open Sea	Recent Use	-1.72E-03 (1.16E-03)	0.140008	0.883073	-6.57E-03 (1.23E-03)	8.79637e-08	0.00925421
cg09607178	chr6	29978432	NCRNA00171	Body	Shelf	Recent Use	1.95E-03 (2.93E-03)	0.504497	0.967927	1.61E-02 (3.04E-03)	1.05897e-07	0.00990304
cg02337960	chr19	17378645	C19orf62	5'UTR	Open Sea	Recent Use	-7.34E-04 (2.14E-03)	0.731697	0.987886	-9.02E-03 (1.72E-03)	1.65795e-07	0.0103003
cg00500007	chr13	35624620	NBEA	Body	Open Sea	Recent Use	9.93E-04 (4.24E-03)	0.81479	0.992487	1.91E-02 (3.66E-03)	1.73754e-07	0.0103003
cg21426547	chr7	34697678	NPSR1	TSS1500	Open Sea	Recent Use	-1.74E-04 (1.41E-03)	0.901787	0.996382	5.48E-03 (1.05E-03)	1.82378e-07	0.0103003
cg26003997	chr9	96395832	PHF2	Body	Open Sea	Recent Use	8.76E-04 (1.13E-03)	0.438469	0.96049	7.11E-03 (1.36E-03)	1.85343e-07	0.0103003
cg08795904	chr22	50695594	MAPK12	Body	Shelf	Recent Use	1.65E-04 (9.11E-04)	0.856139	0.994516	5.03E-03 (9.66E-04)	1.89136e-07	0.0103003
cg17350345	chr9	137558909	COL5A1	Body	Open Sea	Recent Use	-9.39E-04 (1.95E-03)	0.630115	0.980045	-1.02E-02 (1.95E-03)	2.01828e-07	0.0103003
cg17968304	chr20	11916902			Open Sea	Recent Use	2.01E-03 (1.45E-03)	0.167578	0.89563	8.14E-03 (1.57E-03)	2.03356e-07	0.0103003
cg14500389	chr2	136595446	LCT	TSS1500	Open Sea	Recent Use	4.17E-04 (1.84E-03)	0.821001	0.992804	7.87E-03 (1.52E-03)	2.08053e-07	0.0103003
cg09825346	chr1	161718614	DUSP12	TSS1500	Shore	Recent Use	4.73E-03 (1.51E-03)	0.00170554	0.48253	7.34E-03 (1.44E-03)	3.3834e-07	0.014686
cg22798873	chr12	133365274	GOLGA3	Body	Shore	Recent Use	-9.63E-04 (1.31E-03)	0.461839	0.963165	4.80E-03 (9.41E-04)	3.42107e-07	0.014686
cg22878990	chr3	16477718	RFTN1	Body	Open Sea	Recent Use	1.37E-03 (1.72E-03)	0.42734	0.959128	7.91E-03 (1.55E-03)	3.48986e-07	0.014686
cg15391425	chr1	3106994	PRDM16	Body	Shore	Recent Use	2.92E-04 (1.48E-03)	0.844156	0.993908	-5.82E-03 (1.15E-03)	4.10076e-07	0.0160249
cg23268344	chr4	3265763	C4orf44	3'UTR	Open Sea	Recent Use	-1.33E-03 (1.90E-03)	0.482624	0.965703	-7.11E-03 (1.41E-03)	4.18883e-07	0.0160249
cg16664193	chr17	35227046			Open Sea	Recent Use	-2.57E-03 (1.39E-03)	0.0650759	0.819125	-7.79E-03 (1.55E-03)	4.67393e-07	0.0163082
cg21756190	chr1	203200109	CHIT1	TSS1500	Open Sea	Recent Use	9.80E-04 (1.44E-03)	0.495038	0.966923	-6.39E-03 (1.27E-03)	4.79947e-07	0.0163082
cg02038919	chr7	43232885	HECW1	5'UTR	Open Sea	Recent Use	3.35E-03 (2.60E-03)	0.197512	0.907061	1.22E-02 (2.42E-03)	4.84417e-07	0.0163082
cg20958467	chr6	2876805	SERPINB9P1	TSS200	Shore	Recent Use	-3.19E-03 (1.17E-03)	0.006113	0.592549	-6.54E-03 (1.31E-03)	6.26213e-07	0.0197218
cg05208619	chr3	13252098			Open Sea	Recent Use	3.40E-03 (1.43E-03)	0.017118	0.695197	7.80E-03 (1.57E-03)	6.57185e-07	0.0197218
cg23901606	chr3	122695455	SEMA5B	TSS1500	Open Sea	Recent Use	-7.87E-05 (1.77E-03)	0.964518	0.998785	6.15E-03 (1.24E-03)	7.02827e-07	0.0197218
cg14223646	chr7	155855699			Shore	Recent Use	1.28E-03 (2.11E-03)	0.545059	0.972561	9.08E-03 (1.83E-03)	7.07049e-07	0.0197218
cg19414984	chr15	52079949	TMOD2	Body	Open Sea	Recent Use	1.34E-03 (2.02E-03)	0.505895	0.968137	1.17E-02 (2.35E-03)	7.24935e-07	0.0197218
cg15204119	chr19	10613180	KEAP1	5'UTR	Island	Recent Use	-1.62E-03 (2.14E-03)	0.447788	0.961487	-1.02E-02 (2.05E-03)	7.61372e-07	0.0197218
cg01738710	chr1	44182062	ST3GAL3	5'UTR	Open Sea	Recent Use	6.47E-04 (1.10E-03)	0.558263	0.973482	-5.43E-03 (1.10E-03)	7.72276e-07	0.0197218
cg16609878	chr10	96328888	HELLS	5'UTR	Open Sea	Recent Use	1.74E-03 (2.39E-03)	0.466285	0.963543	1.02E-02 (2.06E-03)	7.73276e-07	0.0197218
cg03116409	chr12	66042554			Open Sea	Recent Use	4.13E-04 (1.19E-03)	0.729312	0.987645	6.25E-03 (1.27E-03)	8.33053e-07	0.0206215
cg16276224	chr11	3647086	TRPC2	TSS1500	Open Sea	Recent Use	2.00E-03 (1.47E-03)	0.173617	0.898829	6.61E-03 (1.35E-03)	8.86498e-07	0.0208289
cg07344661	chr4	185187124			Open Sea	Recent Use	-1.75E-03 (2.35E-03)	0.456994	0.962742	-1.12E-02 (2.28E-03)	8.90927e-07	0.0208289
cg27068206	chr11	70559053	SHANK2	Body	Open Sea	Recent Use	-4.36E-04 (1.84E-03)	0.812384	0.992277	7.91E-03 (1.61E-03)	9.72152e-07	0.0220251
cg21352345	chr14	73129354	DPF3	3'UTR	Open Sea	Recent Use	8.61E-04 (1.53E-03)	0.573614	0.974888	8.78E-03 (1.80E-03)	1.01174e-06	0.0220251
cg03221819	chr10	75647445			Open Sea	Recent Use	-1.36E-03 (2.04E-03)	0.503779	0.967881	-1.05E-02 (2.16E-03)	1.0206e-06	0.0220251
cg20985028	chr1	1391055	ATAD3C	Body	Shore	Recent Use	2.99E-03 (3.16E-03)	0.344484	0.945486	1.17E-02 (2.40E-03)	1.07069e-06	0.0221095
cg22528521	chr19	1424814	DAZAP1	Body	Island	Recent Use	2.18E-03 (1.45E-03)	0.13259	0.878692	3.93E-03 (8.06E-04)	1.09115e-06	0.0221095
cg08839808	chr6	156983304			Open Sea	Recent Use	4.65E-03 (2.72E-03)	0.087798	0.846059	1.25E-02 (2.56E-03)	1.10332e-06	0.0221095
cg11367172	chr7	55605450	VOPP1	TSS200	Open Sea	Recent Use	7.31E-04 (1.83E-03)	0.689007	0.984599	-8.89E-03 (1.83E-03)	1.19345e-06	0.0233594
cg19583287	chr3	186205811	LOC253573	Body	Open Sea	Recent Use	-1.05E-03 (1.73E-03)	0.541506	0.972193	-8.02E-03 (1.66E-03)	1.28278e-06	0.0245372
cg18881764	chr1	36023927	KIAA0319L	TSS1500	Shore	Recent Use	-3.94E-03 (1.92E-03)	0.0402396	0.77622	-8.23E-03 (1.71E-03)	1.44174e-06	0.0265459
cg00785657	chr19	35168593	ZNF302	1stExon	Island	Recent Use	3.46E-04 (1.08E-03)	0.747875	0.988836	6.62E-03 (1.37E-03)	1.45087e-06	0.0265459
cg26582338	chr3	155523741	C3orf33	5'UTR	Island	Recent Use	3.12E-03 (2.31E-03)	0.176727	0.900077	8.58E-03 (1.78E-03)	1.54089e-06	0.0275931
cg06716419	chr4	188097967			Open Sea	Recent Use	4.62E-03 (1.67E-03)	0.00581668	0.588938	6.72E-03 (1.40E-03)	1.57971e-06	0.0276989
cg03093806	chr15	40331377	SRP14	1stExon	Island	Recent Use	-2.68E-03 (1.14E-03)	0.0188449	0.704966	7.45E-03 (1.55E-03)	1.63373e-06	0.0280615
cg25343008	chr1	202470230	PPP1R12B	Body	Open Sea	Recent Use	-8.30E-04 (1.88E-03)	0.658243	0.982503	6.06E-03 (1.26E-03)	1.68789e-06	0.0284119
cg23314514	chr14	104852775			Open Sea	Recent Use	-3.17E-04 (1.09E-03)	0.771135	0.990283	-4.92E-03 (1.03E-03)	1.74164e-06	0.0287418
cg09132256	chr16	84535908	KIAA1609	5'UTR	Shelf	Recent Use	1.73E-03 (1.81E-03)	0.337865	0.944031	7.94E-03 (1.67E-03)	1.90349e-06	0.0294248
cg18211706	chr12	54867332	GTSF1	5'UTR	Open Sea	Recent Use	3.05E-03 (1.81E-03)	0.0922235	0.850338	7.80E-03 (1.64E-03)	1.94308e-06	0.0294248
cg15540553	chr11	64018643	PLCB3	TSS1500	Island	Recent Use	-4.38E-03 (2.68E-03)	0.101845	0.858284	-1.20E-02 (2.52E-03)	1.95535e-06	0.0294248
cg06969469	chr2	121554817	GLI2	TSS200	Open Sea	Recent Use	-4.47E-04 (1.64E-03)	0.7858	0.990973	6.98E-03 (1.47E-03)	1.97129e-06	0.0294248
cg26924392	chr17	75238749			Open Sea	Recent Use	2.08E-03 (1.98E-03)	0.293389	0.935179	9.31E-03 (1.96E-03)	1.97166e-06	0.0294248
cg06815210	chr3	8844052			Open Sea	Recent Use	-1.93E-03 (2.17E-03)	0.374977	0.951299	-8.66E-03 (1.82E-03)	2.01649e-06	0.0294248
cg20299935	chr17	21795943			Open Sea	Recent Use	8.64E-04 (1.65E-03)	0.600827	0.977422	7.96E-03 (1.68E-03)	2.07965e-06	0.0294248
cg01443684	chr1	39314427	RRAGC	Body	Open Sea	Recent Use	2.14E-03 (2.38E-03)	0.368528	0.950346	1.16E-02 (2.43E-03)	2.08749e-06	0.0294248
cg21392402	chr14	91163691	TTC7B	Body	Open Sea	Recent Use	2.68E-03 (1.27E-03)	0.0343354	0.762548	5.41E-03 (1.14E-03)	2.09883e-06	0.0294248
cg02646643	chr3	184026751	PSMD2	3'UTR	Open Sea	Recent Use	1.73E-03 (2.37E-03)	0.464888	0.963362	9.93E-03 (2.10E-03)	2.17291e-06	0.0294248
cg16504439	chr4	20647245			Open Sea	Recent Use	-1.35E-03 (1.51E-03)	0.370741	0.95061	-7.07E-03 (1.49E-03)	2.17633e-06	0.0294248
cg12028375	chr3	66534318	LRIG1	Body	Open Sea	Recent Use	-7.03E-04 (1.44E-03)	0.625027	0.979514	-5.62E-03 (1.19E-03)	2.20256e-06	0.0294248
cg02616769	chr3	22348099			Open Sea	Recent Use	5.84E-04 (2.73E-03)	0.83064	0.993381	-9.22E-03 (1.95E-03)	2.2434e-06	0.029502
cg17544636	chr17	30345789			Open Sea	Recent Use	-3.71E-04 (1.98E-03)	0.851286	0.994231	1.13E-02 (2.40E-03)	2.39492e-06	0.0305905
cg11035992	chr17	7657473	RPL29P2	TSS200	Open Sea	Recent Use	-1.89E-03 (1.50E-03)	0.20908	0.910632	6.24E-03 (1.32E-03)	2.39886e-06	0.0305905
cg27209861	chr1	6978798	CAMTA1	Body	Open Sea	Recent Use	8.32E-04 (7.41E-04)	0.261327	0.926684	3.79E-03 (8.04E-04)	2.51115e-06	0.0315272
cg09254142	chr1	25943891	MAN1C1	TSS200	Shore	Recent Use	-8.19E-04 (2.52E-03)	0.745225	0.988774	-5.93E-03 (1.26E-03)	2.54723e-06	0.0315272
cg16066871	chr10	133208486			Open Sea	Recent Use	-2.45E-03 (1.38E-03)	0.0763182	0.833338	-6.22E-03 (1.32E-03)	2.58723e-06	0.0315581
cg09393453	chr19	54224374	MIR517B	Body	Open Sea	Recent Use	8.73E-04 (1.39E-03)	0.528609	0.970707	5.99E-03 (1.28E-03)	2.68281e-06	0.0319225
cg18319941	chr7	64894861			Open Sea	Recent Use	1.61E-02 (6.91E-03)	0.0195251	0.707818	2.91E-02 (6.20E-03)	2.69296e-06	0.0319225
cg20424400	chr12	110026737	MVK	Body	Open Sea	Recent Use	1.72E-03 (1.23E-03)	0.161991	0.893571	5.58E-03 (1.19E-03)	2.88366e-06	0.0337083
cg13552867	chr1	160053689	KCNJ9	5'UTR	Shore	Recent Use	-3.47E-03 (4.10E-03)	0.398018	0.954609	-1.74E-02 (3.72E-03)	2.97689e-06	0.0341464
cg07011775	chr10	72964759			Open Sea	Recent Use	-3.25E-03 (2.02E-03)	0.108659	0.863686	-1.05E-02 (2.26E-03)	3.04134e-06	0.0341464
cg23714123	chr10	60228239			Open Sea	Recent Use	-7.90E-04 (1.32E-03)	0.548236	0.972891	4.75E-03 (1.02E-03)	3.12439e-06	0.0341464
cg15412087	chr11	120085145	OAF	Body	Shelf	Recent Use	-1.15E-03 (1.38E-03)	0.402777	0.955414	-5.47E-03 (1.17E-03)	3.12913e-06	0.0341464
cg01668099	chr11	130026798			Shelf	Recent Use	-8.85E-04 (1.09E-03)	0.415279	0.957438	-4.72E-03 (1.01E-03)	3.1523e-06	0.0341464
cg21491555	chr22	19967786	ARVCF	Body	Island	Recent Use	1.64E-03 (1.49E-03)	0.269073	0.928231	7.66E-03 (1.64E-03)	3.16456e-06	0.0341464
cg10620881	chr7	158280480	PTPRN2	Body	Shore	Recent Use	4.10E-03 (1.92E-03)	0.0325921	0.756428	9.00E-03 (1.93E-03)	3.32142e-06	0.0353853
cg13337507	chr18	3050831			Open Sea	Recent Use	5.31E-03 (2.68E-03)	0.047942	0.790611	1.05E-02 (2.26E-03)	3.3822e-06	0.0355824
cg25069772	chr6	12867139	PHACTR1	Body	Open Sea	Recent Use	-1.11E-03 (1.42E-03)	0.433666	0.96009	-3.81E-03 (8.23E-04)	3.55205e-06	0.036908
cg08153621	chr19	53561441			Island	Recent Use	2.69E-03 (3.37E-03)	0.425081	0.958895	1.44E-02 (3.10E-03)	3.62672e-06	0.0372243
cg04711836	chr17	39882259	HAP1	Body	Open Sea	Recent Use	1.73E-03 (1.51E-03)	0.252403	0.923708	-5.94E-03 (1.28E-03)	3.83196e-06	0.038103
cg20145687	chr3	16461636	RFTN1	Body	Open Sea	Recent Use	3.52E-04 (2.33E-03)	0.880265	0.995502	1.09E-02 (2.37E-03)	3.85751e-06	0.038103
cg16674248	chr22	46664402	TTC38	Body	Shore	Recent Use	4.20E-03 (3.20E-03)	0.188886	0.904232	9.64E-03 (2.09E-03)	3.91107e-06	0.038103
cg11588001	chr19	29704240	UQCRFS1	TSS200	Island	Recent Use	-4.21E-03 (2.08E-03)	0.0427829	0.782233	-9.60E-03 (2.08E-03)	3.95038e-06	0.038103
cg02905178	chr4	7025904	TBC1D14	Body	Shore	Recent Use	-6.86E-04 (1.29E-03)	0.595669	0.976909	6.93E-03 (1.50E-03)	3.96405e-06	0.038103
cg24007376	chr13	51275033			Open Sea	Recent Use	9.13E-04 (9.59E-04)	0.340799	0.944689	4.64E-03 (1.01E-03)	4.02268e-06	0.038103
cg21234547	chr3	42236831	TRAK1	Body	Open Sea	Recent Use	1.40E-03 (1.54E-03)	0.362015	0.949052	7.80E-03 (1.69E-03)	4.02924e-06	0.038103
cg19580944	chr5	25569450			Open Sea	Recent Use	4.65E-03 (2.76E-03)	0.0919527	0.850121	1.13E-02 (2.45E-03)	4.1748e-06	0.0390408
cg23916896	chr5	368804	AHRR	Body	Shore	Recent Use	-1.04E-02 (4.73E-03)	0.0279273	0.741443	-1.83E-02 (3.98E-03)	4.26354e-06	0.0393116
cg09040721	chr6	41658881	TFEB	Body	Open Sea	Recent Use	2.56E-03 (1.80E-03)	0.156336	0.891132	8.55E-03 (1.86E-03)	4.33011e-06	0.0393116
cg14219071	chr2	48996041	STON1-GTF2A1L	Body	Open Sea	Recent Use	-4.18E-03 (3.09E-03)	0.176297	0.899752	-1.20E-02 (2.61E-03)	4.34387e-06	0.0393116
cg10270293	chr16	4654666			Open Sea	Recent Use	3.98E-03 (3.36E-03)	0.236554	0.91919	1.22E-02 (2.65E-03)	4.50067e-06	0.0402973
cg10616121	chr11	111895341	DLAT	TSS200	Shore	Recent Use	-3.77E-03 (1.35E-03)	0.00530347	0.5802	-7.61E-03 (1.66E-03)	4.71424e-06	0.0417652
cg05169160	chr2	178484487	TTC30A	TSS1500	Shore	Recent Use	2.30E-04 (1.31E-03)	0.860236	0.994697	5.11E-03 (1.12E-03)	4.8831e-06	0.0428105
cg03991223	chr1	55542588	USP24	Body	Open Sea	Recent Use	1.12E-04 (1.18E-03)	0.92438	0.997466	5.30E-03 (1.16E-03)	5.16099e-06	0.0442261
cg11175241	chr12	32669224	FGD4	5'UTR	Open Sea	Recent Use	8.51E-04 (1.45E-03)	0.557319	0.973393	-5.18E-03 (1.14E-03)	5.17574e-06	0.0442261
cg21960184	chr11	113804386	HTR3B	Body	Open Sea	Recent Use	6.85E-04 (1.71E-03)	0.687984	0.984558	7.57E-03 (1.66E-03)	5.29675e-06	0.0442261
cg17902007	chr13	101184847	A2LD1	5'UTR	Island	Recent Use	-1.17E-03 (1.02E-03)	0.252335	0.9237	4.38E-03 (9.62E-04)	5.29916e-06	0.0442261
cg13966609	chr11	117352730	DSCAML1	Body	Island	Recent Use	9.25E-04 (9.27E-04)	0.318473	0.940591	3.31E-03 (7.27E-04)	5.30731e-06	0.0442261
cg11518846	chr6	133562246	EYA4	TSS1500	Island	Recent Use	-2.95E-03 (2.26E-03)	0.19149	0.905153	-8.95E-03 (1.97E-03)	5.53064e-06	0.0454238
cg00250546	chr5	22168242	CDH12	5'UTR	Open Sea	Recent Use	-3.91E-04 (3.02E-03)	0.89708	0.996318	9.12E-03 (2.01E-03)	5.55898e-06	0.0454238
cg02669268	chr2	209130300	PIKFYVE	TSS1500	Shore	Recent Use	-4.25E-03 (2.36E-03)	0.0721912	0.82856	-1.18E-02 (2.59E-03)	5.72186e-06	0.0458949
cg06466031	chr19	37329448	ZNF790	TSS200	Island	Recent Use	3.32E-03 (4.19E-03)	0.428653	0.95922	1.56E-02 (3.44E-03)	5.77601e-06	0.0458949
cg24433156	chr22	36884483	FOXRED2	3'UTR	Open Sea	Recent Use	5.20E-04 (2.61E-03)	0.84189	0.993713	1.07E-02 (2.36E-03)	5.80194e-06	0.0458949
cg04917373	chr1	231489252	C1orf124	3'UTR	Open Sea	Recent Use	-5.30E-04 (1.50E-03)	0.724158	0.987232	5.34E-03 (1.18E-03)	5.83475e-06	0.0458949
cg21495609	chr11	69080688			Open Sea	Recent Use	-7.33E-04 (1.08E-03)	0.497722	0.967123	3.49E-03 (7.73E-04)	6.13079e-06	0.0471807
cg04831510	chr6	129250744	LAMA2	Body	Shore	Recent Use	1.03E-03 (1.32E-03)	0.432816	0.959879	6.21E-03 (1.37E-03)	6.14256e-06	0.0471807
cg05922265	chr5	120097654			Open Sea	Recent Use	6.63E-03 (3.24E-03)	0.0405547	0.776468	1.30E-02 (2.88E-03)	6.20242e-06	0.0471807
cg02703675	chr11	12159354	MICAL2	TSS1500	Open Sea	Recent Use	-3.59E-04 (1.06E-03)	0.735805	0.988303	-4.94E-03 (1.09E-03)	6.22245e-06	0.0471807
cg18461093	chr12	78048039			Open Sea	Recent Use	8.61E-04 (1.29E-03)	0.505421	0.968053	4.58E-03 (1.01E-03)	6.37809e-06	0.0475599
cg18489009	chr19	46056723	OPA3	3'UTR	Shore	Recent Use	-1.78E-03 (1.36E-03)	0.191337	0.905028	8.62E-03 (1.91E-03)	6.4655e-06	0.0475599
cg05689028	chr11	118086808	AMICA1	5'UTR	Open Sea	Recent Use	-2.70E-03 (1.53E-03)	0.0774751	0.834972	-7.36E-03 (1.63E-03)	6.51083e-06	0.0475599
cg27055782	chr11	2397486	CD81	TSS1500	Shore	Recent Use	-7.26E-04 (1.77E-03)	0.68151	0.984158	-5.72E-03 (1.27E-03)	6.52372e-06	0.0475599
cg24483247	chr4	5890411	CRMP1	Body	Island	Recent Use	-1.47E-03 (3.28E-03)	0.655247	0.982206	1.36E-02 (3.01E-03)	6.57421e-06	0.0475599
cg10138977	chr2	131421912			Open Sea	Recent Use	3.97E-03 (2.93E-03)	0.175227	0.899427	1.15E-02 (2.56E-03)	6.61151e-06	0.0475599
cg03219908	chr5	172659512	NKX2-5	3'UTR	Island	Recent Use	7.59E-03 (2.87E-03)	0.00804484	0.618851	1.44E-02 (3.19E-03)	6.72165e-06	0.0479424
cg21170085	chr9	137645730	COL5A1	Body	Open Sea	Recent Use	-4.75E-03 (2.53E-03)	0.0605837	0.814071	-9.94E-03 (2.21E-03)	6.86581e-06	0.0482067
cg21447227	chr7	158656677	WDR60	Body	Island	Recent Use	2.95E-03 (2.48E-03)	0.233935	0.918845	-9.78E-03 (2.18E-03)	6.89733e-06	0.0482067
cg24339197	chr12	121093625	CABP1	Body	Open Sea	Recent Use	-1.95E-03 (3.63E-03)	0.591193	0.976417	-2.00E-02 (4.45E-03)	6.93054e-06	0.0482067
cg09501516	chr1	163039155	RGS4	1stExon	Open Sea	Recent Use	3.04E-03 (2.40E-03)	0.205471	0.909459	1.31E-02 (2.91E-03)	7.00209e-06	0.0483052
cg05731136	chr11	122571799	UBASH3B	Body	Open Sea	Recent Use	-2.28E-03 (1.23E-03)	0.0628803	0.816875	-5.42E-03 (1.21E-03)	7.38607e-06	0.0496157
cg01947805	chr11	10906230			Open Sea	Recent Use	6.39E-05 (3.21E-03)	0.984097	0.999493	1.55E-02 (3.46E-03)	7.43514e-06	0.0496157
cg10260220	chr17	40811158	TUBG2	TSS200	Shore	Recent Use	-2.44E-03 (2.28E-03)	0.28542	0.932925	-8.25E-03 (1.84E-03)	7.46693e-06	0.0496157
cg10341310	chr8	66582206	MTFR1	Body	Open Sea	Recent Use	4.33E-03 (3.83E-03)	0.258366	0.925513	1.11E-02 (2.47E-03)	7.48204e-06	0.0496157
cg16960213	chr15	43432580	TMEM62	Body	Open Sea	Recent Use	2.45E-03 (2.30E-03)	0.287008	0.933508	1.18E-02 (2.64E-03)	7.52321e-06	0.0496157
cg15088912	chr13	48987465	LPAR6	1stExon	Open Sea	Recent Use	-3.45E-03 (2.68E-03)	0.198101	0.907136	-1.21E-02 (2.69E-03)	7.59312e-06	0.0496157
cg12992554	chr1	17046815	ESPNP	TSS200	Open Sea	Recent Use	2.30E-03 (1.27E-03)	0.070726	0.827107	5.56E-03 (1.24E-03)	7.60471e-06	0.0496157
cg22124000	chr11	105115332			Open Sea	Recent Use	-2.02E-03 (1.68E-03)	0.230216	0.917577	-7.36E-03 (1.65E-03)	7.66654e-06	0.0496343
cg09959525	chr2	161133880	RBMS1	ExonBnd	Open Sea	Recent Use	7.46E-03 (4.19E-03)	0.0748619	0.831385	1.68E-02 (3.76E-03)	7.78016e-06	0.0496703
cg10884287	chr9	140301662	EXD3	Body	Island	Recent Use	7.30E-04 (1.69E-03)	0.666581	0.983082	-1.00E-02 (2.25E-03)	7.79013e-06	0.0496703
cg05575921	chr5	373378	AHRR	Body	Shore	Cumulative Use	-8.51E-02 (1.40E-02)	1.2e-09	0.000993141	-6.94E-02 (1.19E-02)	5e-09	0.00420828
cg21161138	chr5	399360	AHRR	Body	Open Sea	Cumulative Use	-2.15E-02 (6.13E-03)	0.000461809	0.275418	-2.21E-02 (3.94E-03)	2.17e-08	0.00736713
cg09040721	chr6	41658881	TFEB	Body	Open Sea	Cumulative Use	5.42E-03 (4.40E-03)	0.218223	0.871522	1.79E-02 (3.22E-03)	2.63e-08	0.00736713
cg13552867	chr1	160053689	KCNJ9	5'UTR	Shore	Cumulative Use	-9.97E-03 (1.02E-02)	0.327148	0.909151	-3.39E-02 (6.33E-03)	8.81e-08	0.0185321
cg09825346	chr1	161718614	DUSP12	TSS1500	Shore	Cumulative Use	1.23E-02 (3.79E-03)	0.00120768	0.351276	1.51E-02 (2.86E-03)	1.338e-07	0.0225202
cg21263605	chr1	166818686	POGK	Body	Open Sea	Cumulative Use	6.78E-04 (3.37E-03)	0.840273	0.988677	1.19E-02 (2.34E-03)	3.747e-07	0.0376233
cg26003997	chr9	96395832	PHF2	Body	Open Sea	Cumulative Use	-1.23E-03 (2.98E-03)	0.680869	0.97264	1.34E-02 (2.64E-03)	4.134e-07	0.0376233
cg24976193	chr4	100685228			Open Sea	Cumulative Use	-1.22E-02 (4.27E-03)	0.00439215	0.460547	-1.49E-02 (2.95E-03)	4.236e-07	0.0376233
cg00785657	chr19	35168593	ZNF302	1stExon	Island	Cumulative Use	1.38E-03 (2.43E-03)	0.570119	0.957957	1.27E-02 (2.50E-03)	4.238e-07	0.0376233
cg02646643	chr3	184026751	PSMD2	3'UTR	Open Sea	Cumulative Use	2.24E-03 (5.79E-03)	0.698195	0.97461	1.91E-02 (3.79E-03)	4.706e-07	0.0376233
cg02978227	chr3	98292027			Open Sea	Cumulative Use	-1.17E-02 (4.10E-03)	0.00425752	0.457578	-1.69E-02 (3.36E-03)	5.103e-07	0.0376233
cg21352345	chr14	73129354	DPF3	3'UTR	Open Sea	Cumulative Use	4.13E-03 (4.48E-03)	0.356117	0.916436	1.60E-02 (3.21E-03)	5.893e-07	0.0376233
cg03219908	chr5	172659512	NKX2-5	3'UTR	Island	Cumulative Use	1.40E-02 (6.72E-03)	0.0365648	0.674955	2.77E-02 (5.56E-03)	5.938e-07	0.0376233
cg12084925	chr6	33130696	COL11A2	3'UTR	Shore	Cumulative Use	1.75E-04 (3.27E-03)	0.95738	0.997559	1.38E-02 (2.77E-03)	6.258e-07	0.0376233
cg15425280	chr4	158141492	GRIA2	TSS1500	Island	Cumulative Use	7.36E-03 (3.64E-03)	0.0429686	0.694154	1.55E-02 (3.13E-03)	7.162e-07	0.0401827
cg18461093	chr12	78048039			Open Sea	Cumulative Use	1.24E-03 (2.82E-03)	0.660279	0.970252	9.13E-03 (1.85E-03)	7.739e-07	0.0407098

## Sheet: SuppTable3
Supplementable Table 3. Five-Year ΔMarijuana Use vs. ΔMethylation Analysis Among CpGs Identified at Y15
CpG	Chr	Position	Nearest Gene	Genomic Region	Relation to CpG Island	Marijuana Use	β (SE)	P	Bonf. P
cg18110140	chr15	75350380			Open Sea	Recent Use	7.83E-05 (1.99E-03)	0.968682	1
cg21171274	chr15	52539081	MYO5C	Body	Open Sea	Recent Use	-1.21E-03 (1.73E-03)	0.48325	1
cg17218147	chr3	38995416	SCN11A	TSS1500	Open Sea	Recent Use	3.25E-04 (1.80E-03)	0.857082	1
cg12438576	chr11	89232216	NOX4	5'UTR	Open Sea	Recent Use	-1.34E-03 (2.94E-03)	0.647927	1
cg15627771	chr2	192111084	MYO1B	5'UTR	Shore	Recent Use	5.46E-04 (1.26E-03)	0.665207	1
cg18880190	chr15	40399609	BMF	5'UTR	Shore	Recent Use	-2.66E-03 (1.70E-03)	0.118741	1
cg19857151	chr1	235985454	LYST	Body	Open Sea	Recent Use	1.83E-03 (1.90E-03)	0.335323	1
cg13444775	chr11	124546591	SIAE;SPA17	TSS1500	Shelf	Recent Use	-9.22E-03 (3.64E-03)	0.0113955	0.250702
cg05575921	chr5	373378	AHRR	Body	Shore	Recent Use	-1.34E-02 (6.02E-03)	0.0262274	0.577002
cg15607642	chr6	107391589	BEND3	Body	Shore	Recent Use	3.99E-05 (2.41E-03)	0.98683	1
cg10721491	chr19	29581832			Shelf	Recent Use	1.73E-03 (1.79E-03)	0.333814	1
cg05161803	chr6	12393258	RNU6-48P	TSS1500	Open Sea	Recent Use	-1.10E-03 (2.29E-03)	0.630068	1
cg05086879	chr22	39861490	MGAT3	5'UTR	Open Sea	Recent Use	-8.12E-03 (2.61E-03)	0.0019314	0.0424907
cg06300152	chr1	150268771	MRPS21	Body	Shelf	Recent Use	5.53E-04 (1.78E-03)	0.756246	1
cg19856593	chr21	38064236			Shore	Recent Use	2.46E-03 (2.84E-03)	0.388047	1
cg05615552	chr6	33160952	COL11A2	TSS1500	Island	Recent Use	-1.53E-03 (2.31E-03)	0.5078	1
cg16947168	chr3	62651287	CADPS	Body	Open Sea	Recent Use	-3.99E-03 (2.42E-03)	0.0989641	1
cg05009104	chr7	45002980	MYO1G	Body	Shore	Recent Use	5.50E-03 (2.98E-03)	0.0654399	1
cg15802887	chr1	32420496			Open Sea	Recent Use	-1.16E-03 (1.76E-03)	0.510993	1
cg25189904	chr1	68299493	GNG12	TSS1500	Shore	Recent Use	-7.85E-03 (2.91E-03)	0.0071649	0.157628
cg23932689	chr12	110173904	FAM222A	5'UTR	Open Sea	Recent Use	-2.68E-04 (1.71E-03)	0.875782	1
cg12475321	chr3	34711184			Open Sea	Recent Use	2.21E-03 (2.28E-03)	0.333497	1
cg05575921	chr5	373378	AHRR	Body	Shore	Cumulative Use	-6.47E-02 (2.84E-02)	0.0229456	0.711314
cg18880190	chr15	40399609	BMF	5'UTR	Shore	Cumulative Use	-1.21E-02 (7.97E-03)	0.130039	1
cg07064251	chr2	43948676	PLEKHH2	Body	Open Sea	Cumulative Use	-7.14E-04 (8.59E-03)	0.933813	1
cg23932689	chr12	110173904	FAM222A	5'UTR	Open Sea	Cumulative Use	-1.20E-03 (8.26E-03)	0.884144	1
cg25189904	chr1	68299493	GNG12	TSS1500	Shore	Cumulative Use	-3.05E-02 (1.38E-02)	0.0276562	0.857342
cg13179084	chr12	116638602	MED13L	Body	Open Sea	Cumulative Use	8.93E-03 (9.67E-03)	0.356162	1
cg06326914	chr15	35280920	ZNF770	TSS1500	Shore	Cumulative Use	-1.97E-03 (1.04E-02)	0.849816	1
cg12510044	chr22	22115473	MAPK1	3'UTR	Open Sea	Cumulative Use	1.30E-03 (9.42E-03)	0.890214	1
cg18387338	chr7	26591438			Open Sea	Cumulative Use	4.58E-03 (1.22E-02)	0.706786	1
cg04742550	chr16	31366429	ITGAX	TSS200	Open Sea	Cumulative Use	-3.04E-02 (1.90E-02)	0.110049	1
cg09706133	chr15	68659758	ITGA11	Body	Open Sea	Cumulative Use	-2.51E-03 (5.94E-03)	0.67264	1
cg26764244	chr1	68299511	GNG12	TSS1500	Shore	Cumulative Use	-5.65E-02 (1.80E-02)	0.0017884	0.0554405
cg09935388	chr1	92947588	GFI1	Body	Island	Cumulative Use	2.59E-02 (1.68E-02)	0.122817	1
cg05009104	chr7	45002980	MYO1G	Body	Shore	Cumulative Use	1.34E-02 (1.42E-02)	0.345972	1
cg03905975	chr8	128637338			Open Sea	Cumulative Use	-2.49E-03 (1.08E-02)	0.8173	1
cg04864586	chr4	99853099	EIF4E	TSS1500	Shelf	Cumulative Use	8.51E-03 (7.48E-03)	0.25579	1
cg03802952	chr2	45411645	LINC01121	Body	Open Sea	Cumulative Use	1.83E-03 (1.18E-02)	0.877126	1
cg01212491	chr10	75587308	CAMK2G	Body	Open Sea	Cumulative Use	1.95E-03 (9.99E-03)	0.845444	1
cg15607642	chr6	107391589	BEND3	Body	Shore	Cumulative Use	8.88E-03 (1.14E-02)	0.436975	1
cg27168438	chr3	28283068	CMC1	TSS200	Island	Cumulative Use	4.24E-03 (1.12E-02)	0.705518	1
cg12211703	chr3	42204097	TRAK1	Body	Open Sea	Cumulative Use	-1.11E-02 (9.97E-03)	0.264995	1
cg16736717	chr7	54397759	LINC01445	TSS1500	Open Sea	Cumulative Use	2.20E-03 (1.28E-02)	0.863616	1
cg14374923	chr6	33145955	COL11A2	Body	Open Sea	Cumulative Use	1.87E-02 (9.15E-03)	0.0410789	1
cg05998850	chr2	216981107	XRCC5	Body	Open Sea	Cumulative Use	6.76E-03 (1.24E-02)	0.585113	1
cg19089201	chr7	45002287	MYO1G	3'UTR	Island	Cumulative Use	2.95E-02 (3.02E-02)	0.328662	1
cg20207973	chr22	38506712	BAIAP2L2	TSS200	Open Sea	Cumulative Use	-8.48E-03 (1.05E-02)	0.420734	1
cg26286198	chr20	48812659			Shelf	Cumulative Use	1.01E-02 (7.05E-03)	0.151429	1
cg13810485	chr5	58440035	PDE4D	Body	Open Sea	Cumulative Use	-5.78E-03 (1.05E-02)	0.582383	1
cg06681167	chr2	67828263			Open Sea	Cumulative Use	-9.59E-04 (8.16E-03)	0.906464	1
cg18110140	chr15	75350380			Open Sea	Cumulative Use	-5.32E-04 (9.43E-03)	0.955026	1
cg21852554	chr7	75993585			Open Sea	Cumulative Use	-2.09E-02 (1.05E-02)	0.0476007	1

## Sheet: SuppTable4
Supplementable Table 4. Five-Year ΔMarijuana Use vs. ΔMethylation Analysis Among CpGs Identified at Y20
CpG	Chr	Position	Nearest Gene	Genomic Region	Relation to CpG Island	Marijuana Use	β (SE)	P	Bonf. P
cg21161138	chr5	399360	AHRR	Body	Open Sea	Recent Use	-5.52E-03 (2.09E-03)	0.00836678	1
cg05575921	chr5	373378	AHRR	Body	Shore	Recent Use	-1.34E-02 (6.02E-03)	0.0262274	1
cg06581729	chr2	29004756	PPP1CB	Body	Open Sea	Recent Use	5.92E-03 (2.50E-03)	0.0179367	1
cg26867465	chr3	119399324			Shelf	Recent Use	6.51E-03 (2.88E-03)	0.0242646	1
cg01372788	chr12	124122424	GTF2H3	5'UTR	Shelf	Recent Use	2.72E-03 (1.65E-03)	0.0992272	1
cg19569686	chr19	1555141	MEX3D	3'UTR	Island	Recent Use	4.25E-03 (3.88E-03)	0.273136	1
cg17456749	chr12	111807011	FAM109A	TSS200	Island	Recent Use	-4.85E-03 (1.79E-03)	0.00677015	0.89366
cg00761236	chr13	107305783	LINC00443	TSS1500	Open Sea	Recent Use	-4.02E-03 (2.08E-03)	0.0537324	1
cg09607178	chr6	29978432	NCRNA00171	Body	Shelf	Recent Use	5.97E-03 (4.59E-03)	0.193656	1
cg02337960	chr19	17378645	C19orf62	5'UTR	Open Sea	Recent Use	3.61E-04 (3.28E-03)	0.912461	1
cg00500007	chr13	35624620	NBEA	Body	Open Sea	Recent Use	9.27E-03 (5.75E-03)	0.107429	1
cg21426547	chr7	34697678	NPSR1	TSS1500	Open Sea	Recent Use	4.29E-03 (1.61E-03)	0.0079933	1
cg26003997	chr9	96395832	PHF2	Body	Open Sea	Recent Use	4.44E-04 (2.15E-03)	0.836404	1
cg08795904	chr22	50695594	MAPK12	Body	Shelf	Recent Use	-6.10E-04 (1.58E-03)	0.700216	1
cg17350345	chr9	137558909	COL5A1	Body	Open Sea	Recent Use	-8.87E-03 (3.10E-03)	0.00425454	0.561599
cg17968304	chr20	11916902			Open Sea	Recent Use	3.50E-03 (2.15E-03)	0.104071	1
cg14500389	chr2	136595446	LCT	TSS1500	Open Sea	Recent Use	4.22E-03 (2.53E-03)	0.0958024	1
cg09825346	chr1	161718614	DUSP12	TSS1500	Shore	Recent Use	1.57E-03 (2.41E-03)	0.514971	1
cg22798873	chr12	133365274	GOLGA3	Body	Shore	Recent Use	1.70E-03 (1.57E-03)	0.279568	1
cg22878990	chr3	16477718	RFTN1	Body	Open Sea	Recent Use	3.40E-03 (2.61E-03)	0.192734	1
cg15391425	chr1	3106994	PRDM16	Body	Shore	Recent Use	-1.13E-03 (2.03E-03)	0.578379	1
cg23268344	chr4	3265763	C4orf44	3'UTR	Open Sea	Recent Use	-4.32E-03 (2.23E-03)	0.0529343	1
cg16664193	chr17	35227046			Open Sea	Recent Use	-4.38E-03 (2.01E-03)	0.0301369	1
cg21756190	chr1	203200109	CHIT1	TSS1500	Open Sea	Recent Use	-4.57E-03 (1.94E-03)	0.0187667	1
cg02038919	chr7	43232885	HECW1	5'UTR	Open Sea	Recent Use	6.54E-03 (3.22E-03)	0.04233	1
cg20958467	chr6	2876805	SERPINB9P1	TSS200	Shore	Recent Use	-2.63E-03 (1.57E-03)	0.0950653	1
cg05208619	chr3	13252098			Open Sea	Recent Use	3.04E-03 (2.17E-03)	0.16061	1
cg23901606	chr3	122695455	SEMA5B	TSS1500	Open Sea	Recent Use	3.58E-03 (2.28E-03)	0.11623	1
cg14223646	chr7	155855699			Shore	Recent Use	2.43E-03 (3.11E-03)	0.434146	1
cg19414984	chr15	52079949	TMOD2	Body	Open Sea	Recent Use	5.39E-03 (3.19E-03)	0.0915877	1
cg15204119	chr19	10613180	KEAP1	5'UTR	Island	Recent Use	-7.11E-03 (3.47E-03)	0.0409383	1
cg01738710	chr1	44182062	ST3GAL3	5'UTR	Open Sea	Recent Use	-2.05E-03 (1.89E-03)	0.278612	1
cg16609878	chr10	96328888	HELLS	5'UTR	Open Sea	Recent Use	3.22E-03 (3.62E-03)	0.37422	1
cg03116409	chr12	66042554			Open Sea	Recent Use	2.68E-03 (1.73E-03)	0.121602	1
cg16276224	chr11	3647086	TRPC2	TSS1500	Open Sea	Recent Use	4.77E-03 (2.30E-03)	0.0386745	1
cg07344661	chr4	185187124			Open Sea	Recent Use	-2.63E-03 (2.84E-03)	0.355311	1
cg27068206	chr11	70559053	SHANK2	Body	Open Sea	Recent Use	2.26E-03 (2.66E-03)	0.396141	1
cg21352345	chr14	73129354	DPF3	3'UTR	Open Sea	Recent Use	2.25E-03 (2.61E-03)	0.388782	1
cg03221819	chr10	75647445			Open Sea	Recent Use	-3.55E-03 (3.37E-03)	0.291947	1
cg20985028	chr1	1391055	ATAD3C	Body	Shore	Recent Use	3.13E-03 (3.22E-03)	0.331005	1
cg22528521	chr19	1424814	DAZAP1	Body	Island	Recent Use	1.52E-03 (1.60E-03)	0.343526	1
cg08839808	chr6	156983304			Open Sea	Recent Use	2.04E-03 (4.07E-03)	0.616505	1
cg11367172	chr7	55605450	VOPP1	TSS200	Open Sea	Recent Use	-5.94E-03 (3.35E-03)	0.0765328	1
cg19583287	chr3	186205811	LOC253573	Body	Open Sea	Recent Use	-4.32E-04 (2.25E-03)	0.848075	1
cg18881764	chr1	36023927	KIAA0319L	TSS1500	Shore	Recent Use	-2.29E-03 (2.51E-03)	0.360785	1
cg00785657	chr19	35168593	ZNF302	1stExon	Island	Recent Use	1.15E-03 (2.20E-03)	0.60125	1
cg26582338	chr3	155523741	C3orf33	5'UTR	Island	Recent Use	5.33E-03 (3.02E-03)	0.0776853	1
cg06716419	chr4	188097967			Open Sea	Recent Use	1.17E-03 (2.33E-03)	0.615578	1
cg03093806	chr15	40331377	SRP14	1stExon	Island	Recent Use	6.55E-03 (2.38E-03)	0.00597907	0.789237
cg25343008	chr1	202470230	PPP1R12B	Body	Open Sea	Recent Use	6.94E-03 (3.80E-03)	0.0684036	1
cg23314514	chr14	104852775			Open Sea	Recent Use	6.46E-04 (1.44E-03)	0.653276	1
cg09132256	chr16	84535908	KIAA1609	5'UTR	Shelf	Recent Use	4.03E-03 (1.98E-03)	0.0419004	1
cg18211706	chr12	54867332	GTSF1	5'UTR	Open Sea	Recent Use	1.39E-03 (1.91E-03)	0.467166	1
cg15540553	chr11	64018643	PLCB3	TSS1500	Island	Recent Use	-1.10E-02 (3.47E-03)	0.00156995	0.207234
cg06969469	chr2	121554817	GLI2	TSS200	Open Sea	Recent Use	1.48E-03 (2.26E-03)	0.512671	1
cg26924392	chr17	75238749			Open Sea	Recent Use	4.26E-03 (3.11E-03)	0.170949	1
cg06815210	chr3	8844052			Open Sea	Recent Use	-6.93E-03 (2.68E-03)	0.00981356	1
cg20299935	chr17	21795943			Open Sea	Recent Use	2.78E-03 (2.26E-03)	0.218555	1
cg01443684	chr1	39314427	RRAGC	Body	Open Sea	Recent Use	7.95E-03 (3.07E-03)	0.00980919	1
cg21392402	chr14	91163691	TTC7B	Body	Open Sea	Recent Use	-2.78E-03 (1.93E-03)	0.149696	1
cg02646643	chr3	184026751	PSMD2	3'UTR	Open Sea	Recent Use	2.48E-03 (2.81E-03)	0.378095	1
cg16504439	chr4	20647245			Open Sea	Recent Use	-7.23E-03 (2.19E-03)	0.000994638	0.131292
cg12028375	chr3	66534318	LRIG1	Body	Open Sea	Recent Use	-7.88E-04 (2.11E-03)	0.708199	1
cg02616769	chr3	22348099			Open Sea	Recent Use	-8.98E-04 (2.96E-03)	0.761537	1
cg17544636	chr17	30345789			Open Sea	Recent Use	4.12E-03 (3.40E-03)	0.225869	1
cg11035992	chr17	7657473	RPL29P2	TSS200	Open Sea	Recent Use	7.03E-03 (2.07E-03)	0.000747745	0.0987023
cg27209861	chr1	6978798	CAMTA1	Body	Open Sea	Recent Use	8.24E-04 (1.67E-03)	0.62099	1
cg09254142	chr1	25943891	MAN1C1	TSS200	Shore	Recent Use	-1.72E-03 (2.42E-03)	0.476931	1
cg16066871	chr10	133208486			Open Sea	Recent Use	3.08E-04 (2.24E-03)	0.890621	1
cg09393453	chr19	54224374	MIR517B	Body	Open Sea	Recent Use	3.27E-03 (1.52E-03)	0.0319212	1
cg18319941	chr7	64894861			Open Sea	Recent Use	1.27E-02 (6.86E-03)	0.0648666	1
cg20424400	chr12	110026737	MVK	Body	Open Sea	Recent Use	4.13E-03 (1.73E-03)	0.017236	1
cg13552867	chr1	160053689	KCNJ9	5'UTR	Shore	Recent Use	-2.75E-03 (5.15E-03)	0.593871	1
cg07011775	chr10	72964759			Open Sea	Recent Use	-4.90E-03 (2.85E-03)	0.085332	1
cg23714123	chr10	60228239			Open Sea	Recent Use	2.23E-03 (1.87E-03)	0.233085	1
cg15412087	chr11	120085145	OAF	Body	Shelf	Recent Use	-5.08E-03 (2.32E-03)	0.028915	1
cg01668099	chr11	130026798			Shelf	Recent Use	-3.36E-05 (1.53E-03)	0.98253	1
cg21491555	chr22	19967786	ARVCF	Body	Island	Recent Use	4.28E-03 (2.30E-03)	0.0628504	1
cg10620881	chr7	158280480	PTPRN2	Body	Shore	Recent Use	5.20E-03 (2.73E-03)	0.0570637	1
cg13337507	chr18	3050831			Open Sea	Recent Use	4.91E-03 (3.20E-03)	0.125109	1
cg25069772	chr6	12867139	PHACTR1	Body	Open Sea	Recent Use	-1.14E-03 (1.66E-03)	0.490987	1
cg08153621	chr19	53561441			Island	Recent Use	1.04E-02 (4.16E-03)	0.0129242	1
cg04711836	chr17	39882259	HAP1	Body	Open Sea	Recent Use	-8.36E-04 (2.17E-03)	0.699564	1
cg20145687	chr3	16461636	RFTN1	Body	Open Sea	Recent Use	5.56E-03 (3.18E-03)	0.0806628	1
cg16674248	chr22	46664402	TTC38	Body	Shore	Recent Use	5.34E-03 (3.30E-03)	0.10626	1
cg11588001	chr19	29704240	UQCRFS1	TSS200	Island	Recent Use	-2.97E-03 (3.37E-03)	0.377749	1
cg02905178	chr4	7025904	TBC1D14	Body	Shore	Recent Use	4.78E-03 (2.09E-03)	0.022286	1
cg24007376	chr13	51275033			Open Sea	Recent Use	2.15E-03 (1.90E-03)	0.259207	1
cg21234547	chr3	42236831	TRAK1	Body	Open Sea	Recent Use	2.73E-03 (2.55E-03)	0.285536	1
cg19580944	chr5	25569450			Open Sea	Recent Use	4.27E-03 (2.99E-03)	0.154107	1
cg23916896	chr5	368804	AHRR	Body	Shore	Recent Use	-3.29E-03 (4.66E-03)	0.480352	1
cg09040721	chr6	41658881	TFEB	Body	Open Sea	Recent Use	-5.15E-04 (2.40E-03)	0.830359	1
cg14219071	chr2	48996041	STON1-GTF2A1L	Body	Open Sea	Recent Use	-3.59E-03 (3.16E-03)	0.25603	1
cg10270293	chr16	4654666			Open Sea	Recent Use	-2.35E-03 (3.93E-03)	0.550178	1
cg10616121	chr11	111895341	DLAT	TSS200	Shore	Recent Use	-1.70E-03 (2.45E-03)	0.488876	1
cg05169160	chr2	178484487	TTC30A	TSS1500	Shore	Recent Use	2.20E-03 (2.10E-03)	0.294463	1
cg03991223	chr1	55542588	USP24	Body	Open Sea	Recent Use	2.78E-03 (1.92E-03)	0.148028	1
cg11175241	chr12	32669224	FGD4	5'UTR	Open Sea	Recent Use	-4.06E-03 (2.18E-03)	0.0628547	1
cg21960184	chr11	113804386	HTR3B	Body	Open Sea	Recent Use	2.95E-03 (2.89E-03)	0.308449	1
cg17902007	chr13	101184847	A2LD1	5'UTR	Island	Recent Use	4.01E-03 (1.59E-03)	0.0121401	1
cg13966609	chr11	117352730	DSCAML1	Body	Island	Recent Use	2.06E-03 (1.26E-03)	0.101375	1
cg11518846	chr6	133562246	EYA4	TSS1500	Island	Recent Use	-3.16E-03 (3.48E-03)	0.363985	1
cg00250546	chr5	22168242	CDH12	5'UTR	Open Sea	Recent Use	3.93E-03 (3.36E-03)	0.242982	1
cg02669268	chr2	209130300	PIKFYVE	TSS1500	Shore	Recent Use	-3.80E-03 (3.58E-03)	0.288427	1
cg06466031	chr19	37329448	ZNF790	TSS200	Island	Recent Use	9.91E-03 (4.05E-03)	0.0146661	1
cg24433156	chr22	36884483	FOXRED2	3'UTR	Open Sea	Recent Use	5.75E-03 (3.28E-03)	0.079982	1
cg04917373	chr1	231489252	C1orf124	3'UTR	Open Sea	Recent Use	1.91E-03 (2.08E-03)	0.357836	1
cg21495609	chr11	69080688			Open Sea	Recent Use	1.41E-03 (1.48E-03)	0.341094	1
cg04831510	chr6	129250744	LAMA2	Body	Shore	Recent Use	5.19E-03 (2.19E-03)	0.0180251	1
cg05922265	chr5	120097654			Open Sea	Recent Use	5.42E-04 (5.37E-03)	0.919652	1
cg02703675	chr11	12159354	MICAL2	TSS1500	Open Sea	Recent Use	-2.52E-03 (2.34E-03)	0.283343	1
cg18461093	chr12	78048039			Open Sea	Recent Use	1.12E-03 (1.48E-03)	0.450851	1
cg18489009	chr19	46056723	OPA3	3'UTR	Shore	Recent Use	2.30E-03 (2.31E-03)	0.320485	1
cg05689028	chr11	118086808	AMICA1	5'UTR	Open Sea	Recent Use	-3.51E-03 (2.29E-03)	0.125251	1
cg27055782	chr11	2397486	CD81	TSS1500	Shore	Recent Use	-2.81E-03 (2.22E-03)	0.205735	1
cg24483247	chr4	5890411	CRMP1	Body	Island	Recent Use	1.16E-02 (4.51E-03)	0.0103724	1
cg10138977	chr2	131421912			Open Sea	Recent Use	4.53E-03 (3.36E-03)	0.178255	1
cg03219908	chr5	172659512	NKX2-5	3'UTR	Island	Recent Use	-7.00E-04 (3.85E-03)	0.855737	1
cg21170085	chr9	137645730	COL5A1	Body	Open Sea	Recent Use	-4.30E-03 (3.39E-03)	0.205151	1
cg21447227	chr7	158656677	WDR60	Body	Island	Recent Use	-1.11E-02 (3.40E-03)	0.00111072	0.146615
cg24339197	chr12	121093625	CABP1	Body	Open Sea	Recent Use	-4.37E-03 (4.34E-03)	0.314138	1
cg09501516	chr1	163039155	RGS4	1stExon	Open Sea	Recent Use	6.19E-03 (3.24E-03)	0.0561741	1
cg05731136	chr11	122571799	UBASH3B	Body	Open Sea	Recent Use	-2.48E-03 (2.15E-03)	0.249013	1
cg01947805	chr11	10906230			Open Sea	Recent Use	2.82E-03 (4.75E-03)	0.553417	1
cg10260220	chr17	40811158	TUBG2	TSS200	Shore	Recent Use	-2.76E-03 (3.14E-03)	0.380432	1
cg10341310	chr8	66582206	MTFR1	Body	Open Sea	Recent Use	5.53E-03 (3.74E-03)	0.139268	1
cg16960213	chr15	43432580	TMEM62	Body	Open Sea	Recent Use	4.25E-03 (3.60E-03)	0.238751	1
cg15088912	chr13	48987465	LPAR6	1stExon	Open Sea	Recent Use	-3.96E-03 (2.90E-03)	0.172616	1
cg12992554	chr1	17046815	ESPNP	TSS200	Open Sea	Recent Use	3.94E-03 (2.17E-03)	0.0693927	1
cg22124000	chr11	105115332			Open Sea	Recent Use	-5.26E-03 (2.71E-03)	0.0521873	1
cg09959525	chr2	161133880	RBMS1	ExonBnd	Open Sea	Recent Use	9.94E-03 (4.79E-03)	0.0381633	1
cg10884287	chr9	140301662	EXD3	Body	Island	Recent Use	-4.30E-03 (2.47E-03)	0.0824169	1
cg05575921	chr5	373378	AHRR	Body	Shore	Cumulative Use	-6.47E-02 (2.84E-02)	0.0229456	0.36713
cg21161138	chr5	399360	AHRR	Body	Open Sea	Cumulative Use	-4.44E-02 (9.95E-03)	9.30038e-06	0.000148806
cg09040721	chr6	41658881	TFEB	Body	Open Sea	Cumulative Use	4.57E-02 (1.13E-02)	6.017e-05	0.00096272
cg13552867	chr1	160053689	KCNJ9	5'UTR	Shore	Cumulative Use	-7.86E-02 (2.43E-02)	0.00129735	0.0207575
cg09825346	chr1	161718614	DUSP12	TSS1500	Shore	Cumulative Use	3.82E-02 (1.11E-02)	0.000594795	0.00951673
cg21263605	chr1	166818686	POGK	Body	Open Sea	Cumulative Use	3.58E-02 (9.88E-03)	0.000309852	0.00495763
cg26003997	chr9	96395832	PHF2	Body	Open Sea	Cumulative Use	4.14E-02 (1.01E-02)	4.39183e-05	0.000702693
cg24976193	chr4	100685228			Open Sea	Cumulative Use	-1.91E-02 (1.26E-02)	0.128225	1
cg00785657	chr19	35168593	ZNF302	1stExon	Island	Cumulative Use	3.69E-02 (1.03E-02)	0.000374742	0.00599588
cg02646643	chr3	184026751	PSMD2	3'UTR	Open Sea	Cumulative Use	3.82E-02 (1.33E-02)	0.0041697	0.0667153
cg02978227	chr3	98292027			Open Sea	Cumulative Use	-3.60E-02 (1.08E-02)	0.000873925	0.0139828
cg21352345	chr14	73129354	DPF3	3'UTR	Open Sea	Cumulative Use	3.76E-02 (1.25E-02)	0.00278037	0.0444859
cg03219908	chr5	172659512	NKX2-5	3'UTR	Island	Cumulative Use	5.27E-02 (1.82E-02)	0.00388412	0.0621459
cg12084925	chr6	33130696	COL11A2	3'UTR	Shore	Cumulative Use	3.58E-02 (9.82E-03)	0.000284574	0.00455318
cg15425280	chr4	158141492	GRIA2	TSS1500	Island	Cumulative Use	2.22E-02 (1.23E-02)	0.0712722	1
cg18461093	chr12	78048039			Open Sea	Cumulative Use	2.46E-02 (6.97E-03)	0.000438122	0.00700996

## Sheet: SuppTable5
Supplemental Table 5. Sex-Specific Associations for Recent and Cumulative Marijuana Use at Y15
CpG	Chr	Position	Nearest Gene	Genomic Region	Relation to CpG Island	Marijuana Use	Female Participants			Male Participants
							β (SE)	P	Bonf. P	β (SE)	P	Bonf. P
cg18110140	chr15	75350380			Open Sea	Recent Use	-9.12E-03 (3.51E-03)	0.00941854	0.207208	-1.28E-02 (2.26E-03)	1.49e-08	3.278e-07
cg21171274	chr15	52539081	MYO5C	Body	Open Sea	Recent Use	-4.62E-03 (1.14E-03)	5.17969e-05	0.00113953	-3.24E-03 (8.29E-04)	9.39403e-05	0.00206669
cg17218147	chr3	38995416	SCN11A	TSS1500	Open Sea	Recent Use	-7.12E-03 (1.25E-03)	1.36e-08	2.992e-07	-3.60E-03 (1.17E-03)	0.00201685	0.0443706
cg12438576	chr11	89232216	NOX4	5'UTR	Open Sea	Recent Use	1.54E-02 (2.80E-03)	3.59e-08	7.898e-07	5.24E-03 (2.00E-03)	0.00858512	0.188873
cg15627771	chr2	192111084	MYO1B	5'UTR	Shore	Recent Use	-7.05E-03 (1.55E-03)	5.2281e-06	0.000115018	-4.04E-03 (1.16E-03)	0.000477501	0.010505
cg18880190	chr15	40399609	BMF	5'UTR	Shore	Recent Use	-4.32E-03 (1.49E-03)	0.00382618	0.084176	-5.26E-03 (1.16E-03)	6.1058e-06	0.000134328
cg19857151	chr1	235985454	LYST	Body	Open Sea	Recent Use	4.11E-03 (2.09E-03)	0.049224	1	6.09E-03 (1.33E-03)	4.7956e-06	0.000105503
cg13444775	chr11	124546591	SIAE;SPA17	TSS1500	Shelf	Recent Use	-1.07E-02 (3.85E-03)	0.00540915	0.119001	-1.23E-02 (2.91E-03)	2.23631e-05	0.000491988
cg05575921	chr5	373378	AHRR	Body	Shore	Recent Use	-2.83E-02 (1.03E-02)	0.00586759	0.129087	-3.67E-02 (7.83E-03)	2.7472e-06	6.04384e-05
cg15607642	chr6	107391589	BEND3	Body	Shore	Recent Use	4.63E-03 (1.86E-03)	0.0127761	0.281074	6.48E-03 (1.41E-03)	4.0785e-06	8.9727e-05
cg10721491	chr19	29581832			Shelf	Recent Use	-4.98E-03 (1.22E-03)	4.36508e-05	0.000960318	-5.81E-03 (1.60E-03)	0.000267164	0.00587761
cg05161803	chr6	12393258	RNU6-48P	TSS1500	Open Sea	Recent Use	-4.59E-03 (2.41E-03)	0.0568108	1	-7.49E-03 (1.81E-03)	3.45446e-05	0.000759981
cg05086879	chr22	39861490	MGAT3	5'UTR	Open Sea	Recent Use	-1.05E-02 (3.15E-03)	0.000848624	0.0186697	-1.12E-02 (3.01E-03)	0.000192525	0.00423555
cg06300152	chr1	150268771	MRPS21	Body	Shelf	Recent Use	5.93E-03 (2.55E-03)	0.0198933	0.437652	6.05E-03 (1.68E-03)	0.000302714	0.00665971
cg19856593	chr21	38064236			Shore	Recent Use	-6.52E-03 (3.10E-03)	0.035317	0.776975	-6.37E-03 (1.56E-03)	4.48764e-05	0.000987281
cg05615552	chr6	33160952	COL11A2	TSS1500	Island	Recent Use	7.00E-03 (1.75E-03)	6.27417e-05	0.00138032	4.85E-03 (1.58E-03)	0.00218697	0.0481134
cg16947168	chr3	62651287	CADPS	Body	Open Sea	Recent Use	-9.35E-03 (3.34E-03)	0.00514689	0.113232	-7.28E-03 (2.21E-03)	0.00097937	0.0215462
cg05009104	chr7	45002980	MYO1G	Body	Shore	Recent Use	9.85E-03 (5.22E-03)	0.0590573	1	1.53E-02 (3.54E-03)	1.65671e-05	0.000364476
cg15802887	chr1	32420496			Open Sea	Recent Use	-4.21E-03 (1.05E-03)	6.06372e-05	0.00133402	-3.16E-03 (9.40E-04)	0.000786678	0.0173069
cg25189904	chr1	68299493	GNG12	TSS1500	Shore	Recent Use	-1.51E-02 (4.33E-03)	0.000484632	0.0106619	-1.69E-02 (4.35E-03)	9.7931e-05	0.00215448
cg23932689	chr12	110173904	FAM222A	5'UTR	Open Sea	Recent Use	4.97E-03 (1.98E-03)	0.011929	0.262438	6.55E-03 (1.47E-03)	8.6259e-06	0.00018977
cg12475321	chr3	34711184			Open Sea	Recent Use	-5.46E-03 (2.33E-03)	0.0189893	0.417765	-7.09E-03 (1.75E-03)	5.14482e-05	0.00113186
cg05575921	chr5	373378	AHRR	Body	Shore	Cumulative Use	-9.52E-02 (2.44E-02)	9.42627e-05	0.00292214	-8.27E-02 (1.61E-02)	2.61e-07	8.091e-06
cg18880190	chr15	40399609	BMF	5'UTR	Shore	Cumulative Use	-1.23E-02 (4.16E-03)	0.00312176	0.0967746	-1.40E-02 (2.92E-03)	1.5246e-06	4.72626e-05
cg07064251	chr2	43948676	PLEKHH2	Body	Open Sea	Cumulative Use	1.26E-02 (4.63E-03)	0.00638688	0.197993	1.18E-02 (2.76E-03)	2.08233e-05	0.000645522
cg23932689	chr12	110173904	FAM222A	5'UTR	Open Sea	Cumulative Use	1.83E-02 (5.03E-03)	0.000283514	0.00878894	1.39E-02 (3.50E-03)	6.77461e-05	0.00210013
cg25189904	chr1	68299493	GNG12	TSS1500	Shore	Cumulative Use	-4.41E-02 (1.19E-02)	0.000209273	0.00648746	-3.58E-02 (9.06E-03)	7.61612e-05	0.002361
cg13179084	chr12	116638602	MED13L	Body	Open Sea	Cumulative Use	1.30E-02 (5.29E-03)	0.0138363	0.428924	1.38E-02 (3.05E-03)	6.4667e-06	0.000200468
cg06326914	chr15	35280920	ZNF770	TSS1500	Shore	Cumulative Use	1.45E-02 (6.00E-03)	0.0157746	0.489013	1.80E-02 (4.07E-03)	9.2206e-06	0.000285839
cg12510044	chr22	22115473	MAPK1	3'UTR	Open Sea	Cumulative Use	-4.32E-03 (5.49E-03)	0.430567	1	-1.62E-02 (3.13E-03)	2.404e-07	7.4524e-06
cg18387338	chr7	26591438			Open Sea	Cumulative Use	-7.09E-03 (7.01E-03)	0.311564	1	-2.37E-02 (4.52E-03)	1.534e-07	4.7554e-06
cg04742550	chr16	31366429	ITGAX	TSS200	Open Sea	Cumulative Use	-2.50E-02 (9.89E-03)	0.0115486	0.358007	-3.04E-02 (6.81E-03)	8.1953e-06	0.000254054
cg09706133	chr15	68659758	ITGA11	Body	Open Sea	Cumulative Use	-1.26E-02 (3.74E-03)	0.00073915	0.0229136	-9.66E-03 (2.35E-03)	4.02048e-05	0.00124635
cg26764244	chr1	68299511	GNG12	TSS1500	Shore	Cumulative Use	-4.50E-02 (1.45E-02)	0.00193251	0.0599079	-4.41E-02 (1.07E-02)	3.98515e-05	0.0012354
cg09935388	chr1	92947588	GFI1	Body	Island	Cumulative Use	-4.09E-02 (1.62E-02)	0.0114757	0.355747	-3.64E-02 (9.62E-03)	0.00015423	0.00478114
cg05009104	chr7	45002980	MYO1G	Body	Shore	Cumulative Use	2.90E-02 (1.67E-02)	0.0823469	1	3.44E-02 (7.47E-03)	4.0834e-06	0.000126585
cg03905975	chr8	128637338			Open Sea	Cumulative Use	-2.26E-02 (5.41E-03)	2.86131e-05	0.000887006	-1.53E-02 (5.00E-03)	0.00222232	0.0688921
cg04864586	chr4	99853099	EIF4E	TSS1500	Shelf	Cumulative Use	2.00E-02 (4.16E-03)	1.4758e-06	4.57498e-05	1.07E-02 (2.98E-03)	0.000341374	0.0105826
cg03802952	chr2	45411645	LINC01121	Body	Open Sea	Cumulative Use	-1.96E-02 (8.84E-03)	0.0265583	0.823308	-1.73E-02 (4.24E-03)	4.79652e-05	0.00148692
cg01212491	chr10	75587308	CAMK2G	Body	Open Sea	Cumulative Use	-1.20E-02 (6.32E-03)	0.0574158	1	-1.67E-02 (3.77E-03)	9.7815e-06	0.000303226
cg15607642	chr6	107391589	BEND3	Body	Shore	Cumulative Use	1.43E-02 (4.82E-03)	0.00311385	0.0965293	1.23E-02 (3.04E-03)	5.28193e-05	0.0016374
cg27168438	chr3	28283068	CMC1	TSS200	Island	Cumulative Use	8.68E-03 (6.44E-03)	0.17792	1	1.26E-02 (3.09E-03)	4.43399e-05	0.00137454
cg12211703	chr3	42204097	TRAK1	Body	Open Sea	Cumulative Use	1.03E-02 (3.20E-03)	0.00125359	0.0388612	7.84E-03 (2.10E-03)	0.000182408	0.00565465
cg16736717	chr7	54397759	LINC01445	TSS1500	Open Sea	Cumulative Use	1.36E-02 (5.52E-03)	0.0134639	0.41738	1.57E-02 (4.48E-03)	0.000449195	0.013925
cg14374923	chr6	33145955	COL11A2	Body	Open Sea	Cumulative Use	-3.92E-03 (5.42E-03)	0.469237	1	-1.62E-02 (3.46E-03)	2.8125e-06	8.71875e-05
cg05998850	chr2	216981107	XRCC5	Body	Open Sea	Cumulative Use	1.39E-02 (6.59E-03)	0.0351581	1	1.47E-02 (3.75E-03)	8.44816e-05	0.00261893
cg19089201	chr7	45002287	MYO1G	3'UTR	Island	Cumulative Use	7.00E-02 (3.48E-02)	0.0441839	1	7.17E-02 (1.84E-02)	0.000100307	0.00310951
cg20207973	chr22	38506712	BAIAP2L2	TSS200	Open Sea	Cumulative Use	-1.54E-02 (5.25E-03)	0.00344284	0.106728	-1.41E-02 (4.09E-03)	0.000573932	0.0177919
cg26286198	chr20	48812659			Shelf	Cumulative Use	-1.07E-02 (3.72E-03)	0.00392152	0.121567	-1.02E-02 (2.83E-03)	0.000316865	0.00982282
cg13810485	chr5	58440035	PDE4D	Body	Open Sea	Cumulative Use	-1.96E-02 (7.15E-03)	0.00601608	0.186498	-1.30E-02 (4.28E-03)	0.00246785	0.0765034
cg06681167	chr2	67828263			Open Sea	Cumulative Use	-1.63E-02 (4.96E-03)	0.00102613	0.03181	-1.00E-02 (2.90E-03)	0.000537882	0.0166743
cg18110140	chr15	75350380			Open Sea	Cumulative Use	-2.24E-02 (1.03E-02)	0.0288137	0.893225	-2.34E-02 (5.62E-03)	3.17926e-05	0.000985571
cg21852554	chr7	75993585			Open Sea	Cumulative Use	-8.80E-03 (5.92E-03)	0.137532	1	-1.26E-02 (3.11E-03)	5.2382e-05	0.00162384

## Sheet: SuppTable6
Supplemental Table 6. Sex-Specific Associations for Recent and Cumulative Marijuana Use at Y20
CpG	Chr	Position	Nearest Gene	Genomic Region	Relation to CpG Island	Marijuana Use	Female Participants			Male Participants
							β (SE)	P	Bonf. P	β (SE)	P	Bonf. P
cg21161138	chr5	399360	AHRR	Body	Open Sea	Recent Use	-7.18E-03 (4.16E-03)	0.0840343	1	-1.34E-02 (2.67E-03)	5.324e-07	7.02768e-05
cg05575921	chr5	373378	AHRR	Body	Shore	Recent Use	-3.04E-02 (1.08E-02)	0.00482806	0.637304	-3.40E-02 (7.18E-03)	2.1461e-06	0.000283285
cg06581729	chr2	29004756	PPP1CB	Body	Open Sea	Recent Use	7.13E-03 (1.96E-03)	0.000284728	0.0375842	7.98E-03 (1.40E-03)	1.18e-08	1.5576e-06
cg26867465	chr3	119399324			Shelf	Recent Use	1.20E-02 (2.71E-03)	9.5525e-06	0.00126093	7.54E-03 (1.75E-03)	1.61333e-05	0.0021296
cg01372788	chr12	124122424	GTF2H3	5'UTR	Shelf	Recent Use	6.13E-03 (2.05E-03)	0.0028323	0.373863	5.04E-03 (1.18E-03)	1.96056e-05	0.00258794
cg19569686	chr19	1555141	MEX3D	3'UTR	Island	Recent Use	5.00E-03 (5.77E-03)	0.385347	1	1.38E-02 (2.48E-03)	2.54e-08	3.3528e-06
cg17456749	chr12	111807011	FAM109A	TSS200	Island	Recent Use	-8.57E-03 (1.45E-03)	3.9e-09	5.148e-07	-5.14E-03 (1.49E-03)	0.000584622	0.0771702
cg00761236	chr13	107305783	LINC00443	TSS1500	Open Sea	Recent Use	-3.93E-03 (3.12E-03)	0.207398	1	-7.53E-03 (1.40E-03)	7.88e-08	1.04016e-05
cg09607178	chr6	29978432	NCRNA00171	Body	Shelf	Recent Use	1.11E-03 (7.29E-03)	0.878596	1	2.13E-02 (3.36E-03)	2e-10	2.64e-08
cg02337960	chr19	17378645	C19orf62	5'UTR	Open Sea	Recent Use	-7.11E-03 (3.32E-03)	0.0323814	1	-9.84E-03 (2.43E-03)	5.07109e-05	0.00669384
cg00500007	chr13	35624620	NBEA	Body	Open Sea	Recent Use	1.51E-02 (1.09E-02)	0.165319	1	2.06E-02 (3.66E-03)	1.88e-08	2.4816e-06
cg21426547	chr7	34697678	NPSR1	TSS1500	Open Sea	Recent Use	4.16E-03 (2.62E-03)	0.112233	1	6.15E-03 (1.18E-03)	1.939e-07	2.55948e-05
cg26003997	chr9	96395832	PHF2	Body	Open Sea	Recent Use	5.77E-03 (2.14E-03)	0.00688229	0.908462	7.20E-03 (1.44E-03)	5.689e-07	7.50948e-05
cg08795904	chr22	50695594	MAPK12	Body	Shelf	Recent Use	8.68E-03 (2.72E-03)	0.00143146	0.188953	4.37E-03 (9.38E-04)	3.2337e-06	0.000426848
cg17350345	chr9	137558909	COL5A1	Body	Open Sea	Recent Use	-2.40E-03 (3.05E-03)	0.431249	1	-1.27E-02 (2.71E-03)	2.8957e-06	0.000382232
cg17968304	chr20	11916902			Open Sea	Recent Use	9.87E-03 (3.27E-03)	0.00256077	0.338022	7.10E-03 (1.74E-03)	4.54814e-05	0.00600354
cg14500389	chr2	136595446	LCT	TSS1500	Open Sea	Recent Use	3.55E-03 (2.49E-03)	0.154801	1	9.40E-03 (1.87E-03)	5.095e-07	6.7254e-05
cg09825346	chr1	161718614	DUSP12	TSS1500	Shore	Recent Use	7.16E-03 (2.11E-03)	0.000673881	0.0889523	7.51E-03 (1.82E-03)	3.78983e-05	0.00500258
cg22798873	chr12	133365274	GOLGA3	Body	Shore	Recent Use	6.78E-03 (2.30E-03)	0.00315048	0.415863	4.08E-03 (1.06E-03)	0.000121464	0.0160332
cg22878990	chr3	16477718	RFTN1	Body	Open Sea	Recent Use	7.34E-03 (2.65E-03)	0.00556666	0.734799	8.85E-03 (1.88E-03)	2.6255e-06	0.000346566
cg15391425	chr1	3106994	PRDM16	Body	Shore	Recent Use	-5.17E-03 (2.23E-03)	0.0203925	1	-6.34E-03 (1.21E-03)	1.689e-07	2.22948e-05
cg23268344	chr4	3265763	C4orf44	3'UTR	Open Sea	Recent Use	-9.29E-03 (2.55E-03)	0.000273016	0.0360382	-6.66E-03 (1.76E-03)	0.000159717	0.0210827
cg16664193	chr17	35227046			Open Sea	Recent Use	-8.40E-03 (3.11E-03)	0.00701023	0.925351	-8.37E-03 (1.92E-03)	1.23917e-05	0.0016357
cg21756190	chr1	203200109	CHIT1	TSS1500	Open Sea	Recent Use	-6.61E-03 (4.05E-03)	0.102398	1	-6.76E-03 (1.27E-03)	9.46e-08	1.24872e-05
cg02038919	chr7	43232885	HECW1	5'UTR	Open Sea	Recent Use	6.30E-03 (7.47E-03)	0.39903	1	1.34E-02 (2.53E-03)	1.205e-07	1.5906e-05
cg20958467	chr6	2876805	SERPINB9P1	TSS200	Shore	Recent Use	-8.69E-03 (2.61E-03)	0.000880206	0.116187	-6.11E-03 (1.39E-03)	1.07728e-05	0.00142201
cg05208619	chr3	13252098			Open Sea	Recent Use	3.80E-03 (2.20E-03)	0.0841189	1	9.41E-03 (2.29E-03)	4.07497e-05	0.00537896
cg23901606	chr3	122695455	SEMA5B	TSS1500	Open Sea	Recent Use	1.27E-03 (2.02E-03)	0.53035	1	7.52E-03 (1.55E-03)	1.1993e-06	0.000158308
cg14223646	chr7	155855699			Shore	Recent Use	1.39E-02 (3.92E-03)	0.000376351	0.0496784	8.29E-03 (2.14E-03)	0.000104483	0.0137918
cg19414984	chr15	52079949	TMOD2	Body	Open Sea	Recent Use	1.14E-02 (5.95E-03)	0.0565822	1	1.20E-02 (2.67E-03)	7.0434e-06	0.000929729
cg15204119	chr19	10613180	KEAP1	5'UTR	Island	Recent Use	-8.30E-03 (3.55E-03)	0.0194223	1	-1.08E-02 (2.60E-03)	3.13523e-05	0.0041385
cg01738710	chr1	44182062	ST3GAL3	5'UTR	Open Sea	Recent Use	-6.18E-03 (2.02E-03)	0.0022698	0.299614	-4.78E-03 (1.40E-03)	0.000607619	0.0802058
cg16609878	chr10	96328888	HELLS	5'UTR	Open Sea	Recent Use	1.09E-02 (3.75E-03)	0.00383467	0.506177	1.05E-02 (2.85E-03)	0.000246753	0.0325713
cg03116409	chr12	66042554			Open Sea	Recent Use	1.08E-02 (2.09E-03)	2.52e-07	3.3264e-05	4.89E-03 (1.78E-03)	0.00596237	0.787033
cg16276224	chr11	3647086	TRPC2	TSS1500	Open Sea	Recent Use	9.28E-03 (2.51E-03)	0.000222555	0.0293773	5.77E-03 (1.72E-03)	0.000795638	0.105024
cg07344661	chr4	185187124			Open Sea	Recent Use	-1.08E-02 (3.23E-03)	0.000842333	0.111188	-1.05E-02 (3.47E-03)	0.00260849	0.34432
cg27068206	chr11	70559053	SHANK2	Body	Open Sea	Recent Use	8.56E-03 (2.91E-03)	0.00327309	0.432048	7.63E-03 (1.99E-03)	0.000126583	0.016709
cg21352345	chr14	73129354	DPF3	3'UTR	Open Sea	Recent Use	2.83E-03 (2.91E-03)	0.332257	1	1.04E-02 (1.88E-03)	2.6e-08	3.432e-06
cg03221819	chr10	75647445			Open Sea	Recent Use	-9.95E-03 (5.85E-03)	0.0887861	1	-1.00E-02 (2.45E-03)	4.25329e-05	0.00561434
cg20985028	chr1	1391055	ATAD3C	Body	Shore	Recent Use	3.78E-03 (4.31E-03)	0.379854	1	1.37E-02 (3.04E-03)	6.8319e-06	0.000901811
cg22528521	chr19	1424814	DAZAP1	Body	Island	Recent Use	4.92E-03 (1.63E-03)	0.00254691	0.336192	3.59E-03 (1.04E-03)	0.000550917	0.072721
cg08839808	chr6	156983304			Open Sea	Recent Use	1.35E-02 (4.79E-03)	0.00487704	0.643769	1.27E-02 (3.13E-03)	5.29588e-05	0.00699056
cg11367172	chr7	55605450	VOPP1	TSS200	Open Sea	Recent Use	-5.53E-03 (3.78E-03)	0.143331	1	-1.04E-02 (2.09E-03)	6.167e-07	8.14044e-05
cg19583287	chr3	186205811	LOC253573	Body	Open Sea	Recent Use	-1.21E-02 (2.56E-03)	2.4479e-06	0.000323123	-5.81E-03 (2.39E-03)	0.0150969	1
cg18881764	chr1	36023927	KIAA0319L	TSS1500	Shore	Recent Use	-3.02E-03 (4.38E-03)	0.489801	1	-1.01E-02 (2.00E-03)	3.947e-07	5.21004e-05
cg00785657	chr19	35168593	ZNF302	1stExon	Island	Recent Use	6.97E-03 (2.97E-03)	0.0187255	1	6.28E-03 (1.64E-03)	0.000132942	0.0175483
cg26582338	chr3	155523741	C3orf33	5'UTR	Island	Recent Use	1.56E-03 (5.02E-03)	0.755939	1	9.80E-03 (2.13E-03)	4.0285e-06	0.000531762
cg06716419	chr4	188097967			Open Sea	Recent Use	7.28E-03 (3.49E-03)	0.0373009	1	6.23E-03 (1.58E-03)	8.5437e-05	0.0112777
cg03093806	chr15	40331377	SRP14	1stExon	Island	Recent Use	7.03E-03 (2.29E-03)	0.00216325	0.285549	6.57E-03 (1.90E-03)	0.000536246	0.0707845
cg25343008	chr1	202470230	PPP1R12B	Body	Open Sea	Recent Use	6.63E-03 (3.34E-03)	0.0468838	1	3.08E-03 (1.33E-03)	0.0206618	1
cg23314514	chr14	104852775			Open Sea	Recent Use	-5.05E-03 (2.19E-03)	0.0211986	1	-4.73E-03 (1.29E-03)	0.000237417	0.031339
cg09132256	chr16	84535908	KIAA1609	5'UTR	Shelf	Recent Use	4.93E-03 (3.40E-03)	0.147634	1	9.02E-03 (1.80E-03)	5.362e-07	7.07784e-05
cg18211706	chr12	54867332	GTSF1	5'UTR	Open Sea	Recent Use	7.92E-03 (2.53E-03)	0.00174334	0.230121	7.81E-03 (2.19E-03)	0.000357473	0.0471864
cg15540553	chr11	64018643	PLCB3	TSS1500	Island	Recent Use	-1.18E-02 (4.83E-03)	0.0146929	1	-1.24E-02 (3.11E-03)	7.02075e-05	0.00926739
cg06969469	chr2	121554817	GLI2	TSS200	Open Sea	Recent Use	6.02E-03 (3.62E-03)	0.095919	1	7.44E-03 (1.56E-03)	1.899e-06	0.000250668
cg26924392	chr17	75238749			Open Sea	Recent Use	6.91E-03 (3.15E-03)	0.0281721	1	1.17E-02 (2.69E-03)	1.43778e-05	0.00189787
cg06815210	chr3	8844052			Open Sea	Recent Use	-1.21E-02 (3.66E-03)	0.000921233	0.121603	-7.64E-03 (2.36E-03)	0.00122753	0.162034
cg20299935	chr17	21795943			Open Sea	Recent Use	1.24E-02 (2.92E-03)	2.06342e-05	0.00272371	3.78E-03 (1.81E-03)	0.0369232	1
cg01443684	chr1	39314427	RRAGC	Body	Open Sea	Recent Use	1.09E-02 (5.38E-03)	0.0421351	1	1.11E-02 (2.48E-03)	6.8131e-06	0.000899329
cg21392402	chr14	91163691	TTC7B	Body	Open Sea	Recent Use	7.52E-03 (2.01E-03)	0.000186986	0.0246822	5.04E-03 (1.36E-03)	0.000221446	0.0292309
cg02646643	chr3	184026751	PSMD2	3'UTR	Open Sea	Recent Use	5.40E-03 (3.78E-03)	0.152832	1	1.12E-02 (2.49E-03)	7.534e-06	0.000994488
cg16504439	chr4	20647245			Open Sea	Recent Use	-9.43E-03 (2.06E-03)	4.7177e-06	0.000622736	-5.95E-03 (1.88E-03)	0.00152686	0.201545
cg12028375	chr3	66534318	LRIG1	Body	Open Sea	Recent Use	-4.58E-03 (2.85E-03)	0.108664	1	-6.65E-03 (1.41E-03)	2.5324e-06	0.000334277
cg02616769	chr3	22348099			Open Sea	Recent Use	-9.79E-03 (2.93E-03)	0.000828835	0.109406	-9.47E-03 (2.49E-03)	0.000143639	0.0189603
cg17544636	chr17	30345789			Open Sea	Recent Use	4.06E-03 (5.33E-03)	0.445903	1	1.35E-02 (2.82E-03)	1.6596e-06	0.000219067
cg11035992	chr17	7657473	RPL29P2	TSS200	Open Sea	Recent Use	5.91E-03 (2.41E-03)	0.0143224	1	6.21E-03 (1.55E-03)	5.94418e-05	0.00784632
cg27209861	chr1	6978798	CAMTA1	Body	Open Sea	Recent Use	2.86E-04 (1.79E-03)	0.873186	1	4.95E-03 (9.47E-04)	1.788e-07	2.36016e-05
cg09254142	chr1	25943891	MAN1C1	TSS200	Shore	Recent Use	-1.79E-03 (2.99E-03)	0.550202	1	-6.48E-03 (1.36E-03)	1.7915e-06	0.000236478
cg16066871	chr10	133208486			Open Sea	Recent Use	-3.38E-03 (3.33E-03)	0.310063	1	-7.35E-03 (1.41E-03)	1.796e-07	2.37072e-05
cg09393453	chr19	54224374	MIR517B	Body	Open Sea	Recent Use	3.10E-03 (2.67E-03)	0.245368	1	7.04E-03 (1.35E-03)	1.968e-07	2.59776e-05
cg18319941	chr7	64894861			Open Sea	Recent Use	4.44E-02 (1.05E-02)	2.38931e-05	0.00315389	2.45E-02 (7.38E-03)	0.000916407	0.120966
cg20424400	chr12	110026737	MVK	Body	Open Sea	Recent Use	4.25E-03 (2.77E-03)	0.12464	1	6.19E-03 (1.41E-03)	1.22056e-05	0.00161114
cg13552867	chr1	160053689	KCNJ9	5'UTR	Shore	Recent Use	-1.25E-02 (7.23E-03)	0.0846434	1	-1.83E-02 (4.68E-03)	9.45144e-05	0.0124759
cg07011775	chr10	72964759			Open Sea	Recent Use	-1.08E-02 (4.36E-03)	0.0133233	1	-1.09E-02 (2.84E-03)	0.000127354	0.0168107
cg23714123	chr10	60228239			Open Sea	Recent Use	5.71E-03 (1.81E-03)	0.00158892	0.209738	4.27E-03 (1.33E-03)	0.00137379	0.18134
cg15412087	chr11	120085145	OAF	Body	Shelf	Recent Use	-5.96E-03 (2.47E-03)	0.0160396	1	-4.94E-03 (1.36E-03)	0.000273007	0.0360369
cg01668099	chr11	130026798			Shelf	Recent Use	-6.72E-03 (1.80E-03)	0.000183369	0.0242047	-3.98E-03 (1.23E-03)	0.00115572	0.152556
cg21491555	chr22	19967786	ARVCF	Body	Island	Recent Use	7.37E-03 (3.04E-03)	0.0154807	1	7.69E-03 (2.00E-03)	0.000120976	0.0159689
cg10620881	chr7	158280480	PTPRN2	Body	Shore	Recent Use	1.25E-02 (3.58E-03)	0.000477218	0.0629927	9.00E-03 (2.32E-03)	0.000103123	0.0136122
cg13337507	chr18	3050831			Open Sea	Recent Use	1.23E-02 (3.95E-03)	0.00176301	0.232717	9.79E-03 (2.84E-03)	0.000579555	0.0765013
cg25069772	chr6	12867139	PHACTR1	Body	Open Sea	Recent Use	-4.58E-03 (1.76E-03)	0.00923275	1	-3.25E-03 (1.02E-03)	0.00140134	0.184977
cg08153621	chr19	53561441			Island	Recent Use	1.56E-02 (6.83E-03)	0.0223399	1	1.18E-02 (4.01E-03)	0.00319607	0.421881
cg04711836	chr17	39882259	HAP1	Body	Open Sea	Recent Use	-6.64E-03 (2.17E-03)	0.00216318	0.28554	-5.56E-03 (1.66E-03)	0.000824544	0.10884
cg20145687	chr3	16461636	RFTN1	Body	Open Sea	Recent Use	5.66E-03 (3.19E-03)	0.0765236	1	1.10E-02 (3.14E-03)	0.000438455	0.057876
cg16674248	chr22	46664402	TTC38	Body	Shore	Recent Use	1.61E-02 (5.48E-03)	0.00327812	0.432711	7.06E-03 (2.29E-03)	0.00203682	0.26886
cg11588001	chr19	29704240	UQCRFS1	TSS200	Island	Recent Use	-1.05E-02 (3.00E-03)	0.000482728	0.06372	-8.16E-03 (2.63E-03)	0.00194172	0.256307
cg02905178	chr4	7025904	TBC1D14	Body	Shore	Recent Use	8.43E-03 (4.24E-03)	0.0467956	1	6.96E-03 (1.74E-03)	6.60068e-05	0.0087129
cg24007376	chr13	51275033			Open Sea	Recent Use	7.10E-03 (2.29E-03)	0.00193039	0.254812	3.41E-03 (1.32E-03)	0.00982388	1
cg21234547	chr3	42236831	TRAK1	Body	Open Sea	Recent Use	6.33E-03 (2.68E-03)	0.0181902	1	7.96E-03 (2.08E-03)	0.000125512	0.0165676
cg19580944	chr5	25569450			Open Sea	Recent Use	1.41E-03 (5.04E-03)	0.780295	1	1.49E-02 (2.87E-03)	1.952e-07	2.57664e-05
cg23916896	chr5	368804	AHRR	Body	Shore	Recent Use	-1.63E-02 (7.06E-03)	0.0208986	1	-1.86E-02 (4.33E-03)	1.68524e-05	0.00222452
cg09040721	chr6	41658881	TFEB	Body	Open Sea	Recent Use	7.52E-03 (3.13E-03)	0.0162086	1	8.78E-03 (2.36E-03)	0.000205607	0.0271402
cg14219071	chr2	48996041	STON1-GTF2A1L	Body	Open Sea	Recent Use	-1.31E-02 (5.90E-03)	0.0264265	1	-1.23E-02 (3.03E-03)	4.75835e-05	0.00628102
cg10270293	chr16	4654666			Open Sea	Recent Use	1.64E-02 (4.16E-03)	8.10999e-05	0.0107052	1.08E-02 (3.82E-03)	0.00467732	0.617406
cg10616121	chr11	111895341	DLAT	TSS200	Shore	Recent Use	-7.71E-03 (3.71E-03)	0.0374107	1	-8.39E-03 (1.84E-03)	5.1463e-06	0.000679312
cg05169160	chr2	178484487	TTC30A	TSS1500	Shore	Recent Use	6.64E-03 (2.57E-03)	0.00962096	1	4.85E-03 (1.29E-03)	0.000161414	0.0213067
cg03991223	chr1	55542588	USP24	Body	Open Sea	Recent Use	6.53E-03 (1.80E-03)	0.00028664	0.0378365	4.86E-03 (1.59E-03)	0.00221912	0.292924
cg11175241	chr12	32669224	FGD4	5'UTR	Open Sea	Recent Use	-6.55E-03 (1.97E-03)	0.00091405	0.120655	-5.11E-03 (1.62E-03)	0.00156729	0.206882
cg21960184	chr11	113804386	HTR3B	Body	Open Sea	Recent Use	1.08E-02 (3.67E-03)	0.00329653	0.435142	6.75E-03 (2.08E-03)	0.00113969	0.150439
cg17902007	chr13	101184847	A2LD1	5'UTR	Island	Recent Use	3.00E-03 (1.62E-03)	0.0639071	1	5.00E-03 (1.37E-03)	0.000266524	0.0351811
cg13966609	chr11	117352730	DSCAML1	Body	Island	Recent Use	4.87E-03 (1.22E-03)	6.43311e-05	0.00849171	2.42E-03 (9.20E-04)	0.00855903	1
cg11518846	chr6	133562246	EYA4	TSS1500	Island	Recent Use	-1.93E-03 (4.19E-03)	0.645995	1	-1.18E-02 (2.25E-03)	1.444e-07	1.90608e-05
cg00250546	chr5	22168242	CDH12	5'UTR	Open Sea	Recent Use	5.86E-03 (3.47E-03)	0.0913172	1	1.06E-02 (2.60E-03)	4.37681e-05	0.00577739
cg02669268	chr2	209130300	PIKFYVE	TSS1500	Shore	Recent Use	-1.63E-02 (4.24E-03)	0.000117762	0.0155447	-1.01E-02 (2.69E-03)	0.000178158	0.0235168
cg06466031	chr19	37329448	ZNF790	TSS200	Island	Recent Use	1.01E-02 (4.58E-03)	0.0269383	1	1.76E-02 (4.83E-03)	0.000263386	0.0347669
cg24433156	chr22	36884483	FOXRED2	3'UTR	Open Sea	Recent Use	1.10E-02 (4.73E-03)	0.0196047	1	1.10E-02 (2.67E-03)	3.73975e-05	0.00493647
cg04917373	chr1	231489252	C1orf124	3'UTR	Open Sea	Recent Use	9.48E-03 (3.05E-03)	0.00189614	0.25029	4.17E-03 (1.48E-03)	0.00482681	0.637139
cg21495609	chr11	69080688			Open Sea	Recent Use	3.93E-03 (1.98E-03)	0.0467046	1	3.60E-03 (8.71E-04)	3.56732e-05	0.00470886
cg04831510	chr6	129250744	LAMA2	Body	Shore	Recent Use	9.19E-03 (2.81E-03)	0.00108055	0.142633	5.17E-03 (1.79E-03)	0.00376985	0.49762
cg05922265	chr5	120097654			Open Sea	Recent Use	1.96E-02 (6.34E-03)	0.00204586	0.270054	1.00E-02 (3.41E-03)	0.00325282	0.429373
cg02703675	chr11	12159354	MICAL2	TSS1500	Open Sea	Recent Use	-4.90E-03 (1.67E-03)	0.00341967	0.451396	-4.85E-03 (1.31E-03)	0.000201799	0.0266375
cg18461093	chr12	78048039			Open Sea	Recent Use	3.89E-03 (2.14E-03)	0.0697901	1	4.64E-03 (1.16E-03)	6.13105e-05	0.00809299
cg18489009	chr19	46056723	OPA3	3'UTR	Shore	Recent Use	8.70E-03 (2.74E-03)	0.00151129	0.199491	8.86E-03 (2.70E-03)	0.00104099	0.137411
cg05689028	chr11	118086808	AMICA1	5'UTR	Open Sea	Recent Use	-5.93E-03 (3.36E-03)	0.0773407	1	-7.78E-03 (2.04E-03)	0.000138553	0.018289
cg27055782	chr11	2397486	CD81	TSS1500	Shore	Recent Use	-9.03E-03 (1.86E-03)	1.2456e-06	0.000164419	-4.80E-03 (1.66E-03)	0.00386652	0.510381
cg24483247	chr4	5890411	CRMP1	Body	Island	Recent Use	9.82E-03 (4.75E-03)	0.0388256	1	1.46E-02 (3.59E-03)	4.73858e-05	0.00625493
cg10138977	chr2	131421912			Open Sea	Recent Use	3.74E-03 (3.74E-03)	0.317858	1	1.51E-02 (2.77E-03)	5.06e-08	6.6792e-06
cg03219908	chr5	172659512	NKX2-5	3'UTR	Island	Recent Use	9.06E-03 (5.92E-03)	0.126265	1	1.45E-02 (3.75E-03)	0.000112319	0.0148261
cg21170085	chr9	137645730	COL5A1	Body	Open Sea	Recent Use	-1.27E-02 (4.45E-03)	0.00433783	0.572594	-9.69E-03 (2.89E-03)	0.000816938	0.107836
cg21447227	chr7	158656677	WDR60	Body	Island	Recent Use	-5.89E-03 (3.28E-03)	0.0724919	1	-1.15E-02 (2.76E-03)	3.19447e-05	0.0042167
cg24339197	chr12	121093625	CABP1	Body	Open Sea	Recent Use	-5.31E-03 (8.85E-03)	0.548615	1	-2.51E-02 (5.50E-03)	5.1656e-06	0.000681859
cg09501516	chr1	163039155	RGS4	1stExon	Open Sea	Recent Use	1.54E-02 (7.99E-03)	0.0541085	1	1.40E-02 (2.92E-03)	1.5404e-06	0.000203333
cg05731136	chr11	122571799	UBASH3B	Body	Open Sea	Recent Use	-4.47E-03 (3.43E-03)	0.193046	1	-5.64E-03 (1.29E-03)	1.30533e-05	0.00172304
cg01947805	chr11	10906230			Open Sea	Recent Use	1.02E-02 (7.28E-03)	0.160195	1	1.77E-02 (4.08E-03)	1.38354e-05	0.00182627
cg10260220	chr17	40811158	TUBG2	TSS200	Shore	Recent Use	-8.28E-03 (2.67E-03)	0.00190906	0.251996	-7.72E-03 (2.54E-03)	0.00232305	0.306643
cg10341310	chr8	66582206	MTFR1	Body	Open Sea	Recent Use	9.04E-03 (5.97E-03)	0.129607	1	1.25E-02 (2.97E-03)	2.51094e-05	0.00331444
cg16960213	chr15	43432580	TMEM62	Body	Open Sea	Recent Use	9.36E-03 (6.03E-03)	0.120734	1	1.33E-02 (3.06E-03)	1.33947e-05	0.0017681
cg15088912	chr13	48987465	LPAR6	1stExon	Open Sea	Recent Use	-1.58E-04 (6.82E-03)	0.981575	1	-1.59E-02 (2.66E-03)	2.2e-09	2.904e-07
cg12992554	chr1	17046815	ESPNP	TSS200	Open Sea	Recent Use	6.45E-03 (2.55E-03)	0.0114276	1	4.97E-03 (1.45E-03)	0.000617988	0.0815744
cg22124000	chr11	105115332			Open Sea	Recent Use	-8.35E-03 (2.97E-03)	0.00487602	0.643635	-7.01E-03 (1.91E-03)	0.00023478	0.030991
cg09959525	chr2	161133880	RBMS1	ExonBnd	Open Sea	Recent Use	9.87E-03 (8.69E-03)	0.255806	1	2.03E-02 (4.12E-03)	8.367e-07	0.000110444
cg10884287	chr9	140301662	EXD3	Body	Island	Recent Use	-1.18E-02 (6.46E-03)	0.0679356	1	-9.32E-03 (2.59E-03)	0.000326173	0.0430549
cg05575921	chr5	373378	AHRR	Body	Shore	Cumulative Use	-8.17E-02 (1.75E-02)	3.1319e-06	5.01104e-05	-6.33E-02 (1.56E-02)	5.10168e-05	0.000816269
cg21161138	chr5	399360	AHRR	Body	Open Sea	Cumulative Use	-1.79E-02 (8.63E-03)	0.0377408	0.603852	-2.20E-02 (4.95E-03)	8.8717e-06	0.000141947
cg09040721	chr6	41658881	TFEB	Body	Open Sea	Cumulative Use	2.39E-02 (5.19E-03)	4.2195e-06	6.7512e-05	1.65E-02 (4.15E-03)	7.26968e-05	0.00116315
cg13552867	chr1	160053689	KCNJ9	5'UTR	Shore	Cumulative Use	-3.10E-02 (1.24E-02)	0.0120766	0.193226	-3.40E-02 (7.51E-03)	5.91e-06	9.456e-05
cg09825346	chr1	161718614	DUSP12	TSS1500	Shore	Cumulative Use	1.89E-02 (4.20E-03)	6.7219e-06	0.00010755	1.40E-02 (3.48E-03)	5.85078e-05	0.000936125
cg21263605	chr1	166818686	POGK	Body	Open Sea	Cumulative Use	2.11E-02 (5.12E-03)	3.85047e-05	0.000616075	7.32E-03 (2.46E-03)	0.0029968	0.0479488
cg26003997	chr9	96395832	PHF2	Body	Open Sea	Cumulative Use	1.32E-02 (4.19E-03)	0.0016646	0.0266336	1.26E-02 (3.25E-03)	0.000110895	0.00177432
cg24976193	chr4	100685228			Open Sea	Cumulative Use	-2.62E-02 (6.32E-03)	3.34003e-05	0.000534405	-1.12E-02 (3.34E-03)	0.00085291	0.0136466
cg00785657	chr19	35168593	ZNF302	1stExon	Island	Cumulative Use	1.34E-02 (4.71E-03)	0.00444635	0.0711416	1.26E-02 (3.12E-03)	5.4042e-05	0.000864672
cg02646643	chr3	184026751	PSMD2	3'UTR	Open Sea	Cumulative Use	8.09E-03 (7.56E-03)	0.284267	1	2.26E-02 (4.39E-03)	2.723e-07	4.3568e-06
cg02978227	chr3	98292027			Open Sea	Cumulative Use	-2.29E-02 (5.60E-03)	4.2121e-05	0.000673936	-1.77E-02 (3.93E-03)	6.5488e-06	0.000104781
cg21352345	chr14	73129354	DPF3	3'UTR	Open Sea	Cumulative Use	5.85E-03 (5.92E-03)	0.32284	1	1.85E-02 (3.74E-03)	7.497e-07	1.19952e-05
cg03219908	chr5	172659512	NKX2-5	3'UTR	Island	Cumulative Use	2.37E-02 (1.08E-02)	0.0286533	0.458452	2.64E-02 (6.71E-03)	8.11417e-05	0.00129827
cg12084925	chr6	33130696	COL11A2	3'UTR	Shore	Cumulative Use	1.65E-02 (6.90E-03)	0.0167637	0.268219	1.22E-02 (2.99E-03)	4.29056e-05	0.00068649
cg15425280	chr4	158141492	GRIA2	TSS1500	Island	Cumulative Use	1.82E-02 (5.50E-03)	0.000944836	0.0151174	1.31E-02 (4.05E-03)	0.00124956	0.019993
cg18461093	chr12	78048039			Open Sea	Cumulative Use	7.46E-03 (4.37E-03)	0.08739	1	9.42E-03 (2.08E-03)	6.026e-06	9.6416e-05

## Sheet: SuppTable7
Supplemental Table 7. Race-Specific Associations for Recent and Cumulative Marijuana Use at Y15
CpG	Chr	Position	Nearest Gene	Genomic Region	Relation to CpG Island	Marijuana Use	Black Participants			White Participants
							β (SE)	P	Bonf. P	β (SE)	P	Bonf. P
cg18110140	chr15	75350380			Open Sea	Recent Use	-6.46E-03 (2.93E-03)	0.0274428	0.603741	-1.42E-02 (2.25E-03)	3e-10	6.6e-09
cg21171274	chr15	52539081	MYO5C	Body	Open Sea	Recent Use	-3.63E-03 (9.03E-04)	5.93379e-05	0.00130543	-3.86E-03 (8.35E-04)	3.7952e-06	8.34944e-05
cg17218147	chr3	38995416	SCN11A	TSS1500	Open Sea	Recent Use	-5.18E-03 (1.18E-03)	1.14683e-05	0.000252303	-4.74E-03 (1.39E-03)	0.00066149	0.0145528
cg12438576	chr11	89232216	NOX4	5'UTR	Open Sea	Recent Use	8.40E-03 (2.20E-03)	0.000134681	0.00296299	1.01E-02 (2.48E-03)	4.71956e-05	0.0010383
cg15627771	chr2	192111084	MYO1B	5'UTR	Shore	Recent Use	-6.27E-03 (9.45E-04)	3.23655e-11	7.12041e-10	-2.79E-03 (1.65E-03)	0.0904324	1
cg18880190	chr15	40399609	BMF	5'UTR	Shore	Recent Use	-5.16E-03 (1.11E-03)	3.611e-06	7.9442e-05	-5.07E-03 (1.59E-03)	0.00144554	0.0318019
cg19857151	chr1	235985454	LYST	Body	Open Sea	Recent Use	3.48E-03 (1.51E-03)	0.0212453	0.467397	7.98E-03 (1.54E-03)	2.222e-07	4.8884e-06
cg13444775	chr11	124546591	SIAE;SPA17	TSS1500	Shelf	Recent Use	-1.12E-02 (3.25E-03)	0.000535126	0.0117728	-1.47E-02 (3.38E-03)	1.29749e-05	0.000285448
cg05575921	chr5	373378	AHRR	Body	Shore	Recent Use	-2.32E-02 (9.23E-03)	0.0118371	0.260416	-4.27E-02 (7.72E-03)	3.23e-08	7.106e-07
cg15607642	chr6	107391589	BEND3	Body	Shore	Recent Use	4.42E-03 (1.50E-03)	0.00310026	0.0682058	7.26E-03 (1.69E-03)	1.68801e-05	0.000371362
cg10721491	chr19	29581832			Shelf	Recent Use	-4.15E-03 (1.21E-03)	0.000601189	0.0132262	-6.79E-03 (1.87E-03)	0.00028127	0.00618794
cg05161803	chr6	12393258	RNU6-48P	TSS1500	Open Sea	Recent Use	-5.37E-03 (2.10E-03)	0.0105709	0.232559	-7.13E-03 (1.86E-03)	0.00012861	0.00282941
cg05086879	chr22	39861490	MGAT3	5'UTR	Open Sea	Recent Use	-9.69E-03 (3.02E-03)	0.00135292	0.0297642	-1.24E-02 (3.26E-03)	0.000144909	0.00318799
cg06300152	chr1	150268771	MRPS21	Body	Shelf	Recent Use	6.72E-03 (1.67E-03)	5.89428e-05	0.00129674	5.77E-03 (1.66E-03)	0.000512055	0.0112652
cg19856593	chr21	38064236			Shore	Recent Use	-6.82E-03 (1.87E-03)	0.000266531	0.00586368	-7.22E-03 (1.93E-03)	0.0001904	0.00418879
cg05615552	chr6	33160952	COL11A2	TSS1500	Island	Recent Use	5.84E-03 (1.69E-03)	0.000547243	0.0120394	5.90E-03 (1.69E-03)	0.00048794	0.0107347
cg16947168	chr3	62651287	CADPS	Body	Open Sea	Recent Use	-8.69E-03 (2.26E-03)	0.000121844	0.00268057	-8.41E-03 (2.79E-03)	0.00259051	0.0569912
cg05009104	chr7	45002980	MYO1G	Body	Shore	Recent Use	8.51E-03 (3.71E-03)	0.0216641	0.47661	1.87E-02 (4.00E-03)	3.0173e-06	6.63806e-05
cg15802887	chr1	32420496			Open Sea	Recent Use	-2.24E-03 (1.04E-03)	0.030573	0.672606	-4.01E-03 (9.28E-04)	1.54336e-05	0.000339539
cg25189904	chr1	68299493	GNG12	TSS1500	Shore	Recent Use	-9.24E-03 (3.97E-03)	0.02009	0.441981	-2.35E-02 (6.01E-03)	9.29111e-05	0.00204404
cg23932689	chr12	110173904	FAM222A	5'UTR	Open Sea	Recent Use	4.99E-03 (1.74E-03)	0.00414397	0.0911673	7.30E-03 (1.73E-03)	2.55348e-05	0.000561766
cg12475321	chr3	34711184			Open Sea	Recent Use	-4.92E-03 (1.77E-03)	0.00542339	0.119315	-7.51E-03 (2.23E-03)	0.000760775	0.016737
cg05575921	chr5	373378	AHRR	Body	Shore	Cumulative Use	-8.79E-02 (3.13E-02)	0.00499227	0.15476	-8.49E-02 (1.56E-02)	4.96e-08	1.5376e-06
cg18880190	chr15	40399609	BMF	5'UTR	Shore	Cumulative Use	-1.59E-02 (3.25E-03)	9.979e-07	3.09349e-05	-1.20E-02 (3.53E-03)	0.000658769	0.0204218
cg07064251	chr2	43948676	PLEKHH2	Body	Open Sea	Cumulative Use	1.79E-02 (3.51E-03)	3.266e-07	1.01246e-05	9.84E-03 (3.03E-03)	0.00118821	0.0368346
cg23932689	chr12	110173904	FAM222A	5'UTR	Open Sea	Cumulative Use	1.80E-02 (5.24E-03)	0.00059692	0.0185045	1.48E-02 (4.09E-03)	0.000282934	0.00877094
cg25189904	chr1	68299493	GNG12	TSS1500	Shore	Cumulative Use	-3.05E-02 (9.10E-03)	0.000807193	0.025023	-4.32E-02 (1.14E-02)	0.000146866	0.00455285
cg13179084	chr12	116638602	MED13L	Body	Open Sea	Cumulative Use	1.34E-02 (4.77E-03)	0.00504607	0.156428	1.48E-02 (3.24E-03)	4.8172e-06	0.000149333
cg06326914	chr15	35280920	ZNF770	TSS1500	Shore	Cumulative Use	1.06E-02 (5.65E-03)	0.0616649	1	1.94E-02 (4.41E-03)	1.03511e-05	0.000320884
cg12510044	chr22	22115473	MAPK1	3'UTR	Open Sea	Cumulative Use	-1.38E-02 (4.10E-03)	0.000772883	0.0239594	-1.40E-02 (3.74E-03)	0.000180029	0.00558089
cg18387338	chr7	26591438			Open Sea	Cumulative Use	-2.15E-02 (5.37E-03)	6.062e-05	0.00187922	-2.15E-02 (5.45E-03)	7.70293e-05	0.00238791
cg04742550	chr16	31366429	ITGAX	TSS200	Open Sea	Cumulative Use	-1.84E-02 (9.59E-03)	0.054632	1	-2.97E-02 (7.60E-03)	9.15391e-05	0.00283771
cg09706133	chr15	68659758	ITGA11	Body	Open Sea	Cumulative Use	-9.96E-03 (2.75E-03)	0.000293728	0.00910558	-1.04E-02 (2.85E-03)	0.000260979	0.00809034
cg26764244	chr1	68299511	GNG12	TSS1500	Shore	Cumulative Use	-3.67E-02 (1.45E-02)	0.0114335	0.354439	-5.34E-02 (1.17E-02)	4.5887e-06	0.00014225
cg09935388	chr1	92947588	GFI1	Body	Island	Cumulative Use	-3.93E-02 (1.06E-02)	0.00019981	0.00619411	-4.02E-02 (1.20E-02)	0.000856219	0.0265428
cg05009104	chr7	45002980	MYO1G	Body	Shore	Cumulative Use	2.47E-02 (1.13E-02)	0.0284473	0.881867	3.74E-02 (9.32E-03)	6.05485e-05	0.001877
cg03905975	chr8	128637338			Open Sea	Cumulative Use	-1.53E-02 (6.04E-03)	0.0116208	0.360245	-1.95E-02 (4.52E-03)	1.54895e-05	0.000480174
cg04864586	chr4	99853099	EIF4E	TSS1500	Shelf	Cumulative Use	1.39E-02 (3.90E-03)	0.000382085	0.0118446	1.37E-02 (3.19E-03)	1.87546e-05	0.000581393
cg03802952	chr2	45411645	LINC01121	Body	Open Sea	Cumulative Use	-1.42E-02 (5.83E-03)	0.014716	0.456196	-2.06E-02 (5.08E-03)	4.91217e-05	0.00152277
cg01212491	chr10	75587308	CAMK2G	Body	Open Sea	Cumulative Use	-1.47E-02 (4.91E-03)	0.00280522	0.0869619	-1.73E-02 (4.53E-03)	0.000133372	0.00413453
cg15607642	chr6	107391589	BEND3	Body	Shore	Cumulative Use	1.57E-02 (4.34E-03)	0.000289667	0.00897968	1.37E-02 (3.53E-03)	0.000102598	0.00318053
cg27168438	chr3	28283068	CMC1	TSS200	Island	Cumulative Use	8.04E-03 (4.20E-03)	0.055777	1	1.66E-02 (3.59E-03)	3.9004e-06	0.000120912
cg12211703	chr3	42204097	TRAK1	Body	Open Sea	Cumulative Use	8.68E-03 (2.30E-03)	0.000165259	0.00512302	7.94E-03 (2.77E-03)	0.00420811	0.130451
cg16736717	chr7	54397759	LINC01445	TSS1500	Open Sea	Cumulative Use	1.38E-02 (5.66E-03)	0.0145876	0.452216	1.66E-02 (4.69E-03)	0.000396541	0.0122928
cg14374923	chr6	33145955	COL11A2	Body	Open Sea	Cumulative Use	-1.32E-02 (5.51E-03)	0.0168757	0.523147	-1.34E-02 (3.51E-03)	0.000132701	0.00411374
cg05998850	chr2	216981107	XRCC5	Body	Open Sea	Cumulative Use	1.51E-02 (5.42E-03)	0.00523717	0.162352	1.39E-02 (3.77E-03)	0.000216972	0.00672612
cg19089201	chr7	45002287	MYO1G	3'UTR	Island	Cumulative Use	3.26E-02 (2.23E-02)	0.142636	1	9.25E-02 (1.92E-02)	1.4383e-06	4.45873e-05
cg20207973	chr22	38506712	BAIAP2L2	TSS200	Open Sea	Cumulative Use	-1.61E-02 (4.74E-03)	0.000682559	0.0211593	-1.23E-02 (4.38E-03)	0.00514221	0.159408
cg26286198	chr20	48812659			Shelf	Cumulative Use	-6.29E-03 (3.20E-03)	0.0492382	1	-1.23E-02 (3.11E-03)	8.12537e-05	0.00251886
cg13810485	chr5	58440035	PDE4D	Body	Open Sea	Cumulative Use	-1.72E-02 (5.24E-03)	0.00102544	0.0317887	-1.52E-02 (4.23E-03)	0.000319742	0.00991201
cg06681167	chr2	67828263			Open Sea	Cumulative Use	-1.57E-02 (3.90E-03)	5.83586e-05	0.00180912	-1.03E-02 (3.23E-03)	0.00151056	0.0468273
cg18110140	chr15	75350380			Open Sea	Cumulative Use	-1.79E-02 (7.65E-03)	0.0194554	0.603118	-2.17E-02 (6.42E-03)	0.000707992	0.0219477
cg21852554	chr7	75993585			Open Sea	Cumulative Use	-8.42E-03 (3.47E-03)	0.0152849	0.473832	-1.11E-02 (3.89E-03)	0.00441976	0.137012

## Sheet: SuppTable8
Supplemental Table 8. Race-Specific Associations for Recent and Cumulative Marijuana Use at Y20
CpG	Chr	Position	Nearest Gene	Genomic Region	Relation to CpG Island	Marijuana Use	Black Participants			White Participants
							β (SE)	P	Bonf. P	β (SE)	P	Bonf. P
cg21161138	chr5	399360	AHRR	Body	Open Sea	Recent Use	-8.50E-03 (3.12E-03)	0.00649156	0.856886	-1.46E-02 (2.34E-03)	4e-10	5.28e-08
cg05575921	chr5	373378	AHRR	Body	Shore	Recent Use	-3.71E-02 (1.08E-02)	0.000628757	0.0829959	-3.00E-02 (6.90E-03)	1.39634e-05	0.00184317
cg06581729	chr2	29004756	PPP1CB	Body	Open Sea	Recent Use	1.19E-02 (1.74E-03)	1.05744e-11	1.39582e-09	5.86E-03 (1.80E-03)	0.00116372	0.153611
cg26867465	chr3	119399324			Shelf	Recent Use	1.21E-02 (2.19E-03)	3.55e-08	4.686e-06	6.64E-03 (2.16E-03)	0.00210956	0.278462
cg01372788	chr12	124122424	GTF2H3	5'UTR	Shelf	Recent Use	4.14E-03 (1.34E-03)	0.00197608	0.260843	6.18E-03 (1.59E-03)	0.000106562	0.0140663
cg19569686	chr19	1555141	MEX3D	3'UTR	Island	Recent Use	1.35E-02 (3.67E-03)	0.000232155	0.0306445	1.29E-02 (2.71E-03)	2.0381e-06	0.000269029
cg17456749	chr12	111807011	FAM109A	TSS200	Island	Recent Use	-8.67E-03 (1.33E-03)	1e-10	1.32e-08	-4.73E-03 (1.48E-03)	0.00138978	0.183451
cg00761236	chr13	107305783	LINC00443	TSS1500	Open Sea	Recent Use	-6.85E-03 (2.03E-03)	0.000730561	0.096434	-7.08E-03 (1.49E-03)	1.9121e-06	0.000252397
cg09607178	chr6	29978432	NCRNA00171	Body	Shelf	Recent Use	1.59E-02 (5.67E-03)	0.00498034	0.657405	1.66E-02 (3.59E-03)	3.8107e-06	0.000503012
cg02337960	chr19	17378645	C19orf62	5'UTR	Open Sea	Recent Use	-9.37E-03 (2.14E-03)	1.19997e-05	0.00158396	-7.09E-03 (2.80E-03)	0.0113972	1
cg00500007	chr13	35624620	NBEA	Body	Open Sea	Recent Use	1.72E-02 (6.21E-03)	0.00575053	0.75907	2.20E-02 (4.68E-03)	2.568e-06	0.000338976
cg21426547	chr7	34697678	NPSR1	TSS1500	Open Sea	Recent Use	5.73E-03 (1.65E-03)	0.000515754	0.0680795	4.88E-03 (1.44E-03)	0.000735669	0.0971083
cg26003997	chr9	96395832	PHF2	Body	Open Sea	Recent Use	4.19E-03 (1.88E-03)	0.0257863	1	1.08E-02 (1.96E-03)	3.37e-08	4.4484e-06
cg08795904	chr22	50695594	MAPK12	Body	Shelf	Recent Use	5.13E-03 (1.62E-03)	0.00153688	0.202868	5.27E-03 (1.18E-03)	7.5151e-06	0.000991993
cg17350345	chr9	137558909	COL5A1	Body	Open Sea	Recent Use	-1.13E-02 (3.02E-03)	0.000175033	0.0231044	-1.02E-02 (2.62E-03)	9.38329e-05	0.0123859
cg17968304	chr20	11916902			Open Sea	Recent Use	1.12E-02 (2.30E-03)	1.1974e-06	0.000158057	5.71E-03 (2.07E-03)	0.00576044	0.760377
cg14500389	chr2	136595446	LCT	TSS1500	Open Sea	Recent Use	7.32E-03 (2.27E-03)	0.00128661	0.169833	7.46E-03 (2.13E-03)	0.000464669	0.0613363
cg09825346	chr1	161718614	DUSP12	TSS1500	Shore	Recent Use	8.17E-03 (1.62E-03)	4.611e-07	6.08652e-05	6.75E-03 (2.62E-03)	0.0100921	1
cg22798873	chr12	133365274	GOLGA3	Body	Shore	Recent Use	7.18E-03 (1.43E-03)	4.976e-07	6.56832e-05	2.77E-03 (1.30E-03)	0.0334021	1
cg22878990	chr3	16477718	RFTN1	Body	Open Sea	Recent Use	8.41E-03 (2.10E-03)	6.314e-05	0.00833448	7.21E-03 (2.20E-03)	0.00103135	0.136138
cg15391425	chr1	3106994	PRDM16	Body	Shore	Recent Use	-5.50E-03 (1.82E-03)	0.00254448	0.335872	-7.17E-03 (1.50E-03)	1.7711e-06	0.000233785
cg23268344	chr4	3265763	C4orf44	3'UTR	Open Sea	Recent Use	-8.93E-03 (1.85E-03)	1.3531e-06	0.000178609	-5.96E-03 (2.30E-03)	0.00950846	1
cg16664193	chr17	35227046			Open Sea	Recent Use	-9.77E-03 (2.34E-03)	2.99757e-05	0.00395679	-7.15E-03 (2.27E-03)	0.00159855	0.211009
cg21756190	chr1	203200109	CHIT1	TSS1500	Open Sea	Recent Use	-5.28E-03 (2.60E-03)	0.0423666	1	-7.52E-03 (1.42E-03)	1.095e-07	1.4454e-05
cg02038919	chr7	43232885	HECW1	5'UTR	Open Sea	Recent Use	1.21E-02 (4.72E-03)	0.0100961	1	1.18E-02 (2.41E-03)	9.355e-07	0.000123486
cg20958467	chr6	2876805	SERPINB9P1	TSS200	Shore	Recent Use	-7.38E-03 (2.13E-03)	0.000511573	0.0675277	-5.48E-03 (1.77E-03)	0.00198215	0.261643
cg05208619	chr3	13252098			Open Sea	Recent Use	8.69E-03 (2.05E-03)	2.30405e-05	0.00304135	7.61E-03 (2.46E-03)	0.00194629	0.25691
cg23901606	chr3	122695455	SEMA5B	TSS1500	Open Sea	Recent Use	6.68E-03 (1.99E-03)	0.000811677	0.107141	5.17E-03 (1.81E-03)	0.00433949	0.572813
cg14223646	chr7	155855699			Shore	Recent Use	6.46E-03 (3.79E-03)	0.0883247	1	1.06E-02 (2.02E-03)	1.551e-07	2.04732e-05
cg19414984	chr15	52079949	TMOD2	Body	Open Sea	Recent Use	1.35E-02 (4.09E-03)	0.000928039	0.122501	1.15E-02 (3.07E-03)	0.000169311	0.022349
cg15204119	chr19	10613180	KEAP1	5'UTR	Island	Recent Use	-1.13E-02 (2.84E-03)	7.42642e-05	0.00980287	-1.16E-02 (3.03E-03)	0.000132829	0.0175334
cg01738710	chr1	44182062	ST3GAL3	5'UTR	Open Sea	Recent Use	-6.95E-03 (1.78E-03)	9.29343e-05	0.0122673	-4.69E-03 (1.47E-03)	0.0014773	0.195004
cg16609878	chr10	96328888	HELLS	5'UTR	Open Sea	Recent Use	1.14E-02 (3.53E-03)	0.00121243	0.160041	8.62E-03 (2.77E-03)	0.0018482	0.243962
cg03116409	chr12	66042554			Open Sea	Recent Use	7.16E-03 (1.40E-03)	3.079e-07	4.06428e-05	5.22E-03 (2.29E-03)	0.0225595	1
cg16276224	chr11	3647086	TRPC2	TSS1500	Open Sea	Recent Use	5.43E-03 (1.76E-03)	0.00197116	0.260193	6.12E-03 (1.83E-03)	0.000801475	0.105795
cg07344661	chr4	185187124			Open Sea	Recent Use	-1.24E-02 (2.98E-03)	2.97211e-05	0.00392319	-1.02E-02 (3.99E-03)	0.0109434	1
cg27068206	chr11	70559053	SHANK2	Body	Open Sea	Recent Use	6.99E-03 (2.02E-03)	0.000556793	0.0734967	8.92E-03 (2.37E-03)	0.000171317	0.0226138
cg21352345	chr14	73129354	DPF3	3'UTR	Open Sea	Recent Use	4.30E-03 (3.19E-03)	0.177066	1	1.26E-02 (1.99E-03)	3e-10	3.96e-08
cg03221819	chr10	75647445			Open Sea	Recent Use	-7.11E-03 (3.66E-03)	0.0521394	1	-1.25E-02 (3.18E-03)	7.97321e-05	0.0105246
cg20985028	chr1	1391055	ATAD3C	Body	Shore	Recent Use	1.16E-02 (3.26E-03)	0.000391922	0.0517337	1.11E-02 (3.47E-03)	0.00137605	0.181638
cg22528521	chr19	1424814	DAZAP1	Body	Island	Recent Use	4.67E-03 (9.83E-04)	1.9947e-06	0.0002633	3.50E-03 (1.32E-03)	0.00803475	1
cg08839808	chr6	156983304			Open Sea	Recent Use	1.87E-02 (4.06E-03)	4.3931e-06	0.000579889	8.81E-03 (3.45E-03)	0.010676	1
cg11367172	chr7	55605450	VOPP1	TSS200	Open Sea	Recent Use	-7.55E-03 (2.60E-03)	0.00365626	0.482627	-9.73E-03 (2.33E-03)	3.055e-05	0.0040326
cg19583287	chr3	186205811	LOC253573	Body	Open Sea	Recent Use	-7.35E-03 (2.49E-03)	0.00315014	0.415818	-9.10E-03 (2.20E-03)	3.43891e-05	0.00453936
cg18881764	chr1	36023927	KIAA0319L	TSS1500	Shore	Recent Use	-6.40E-03 (2.61E-03)	0.0142236	1	-8.45E-03 (2.35E-03)	0.000315513	0.0416477
cg00785657	chr19	35168593	ZNF302	1stExon	Island	Recent Use	8.80E-03 (1.92E-03)	4.609e-06	0.000608388	4.68E-03 (1.89E-03)	0.0133972	1
cg26582338	chr3	155523741	C3orf33	5'UTR	Island	Recent Use	6.22E-03 (3.49E-03)	0.0745523	1	8.93E-03 (2.24E-03)	6.76975e-05	0.00893607
cg06716419	chr4	188097967			Open Sea	Recent Use	7.23E-03 (2.16E-03)	0.000811284	0.107089	5.99E-03 (2.30E-03)	0.0092306	1
cg03093806	chr15	40331377	SRP14	1stExon	Island	Recent Use	8.74E-03 (1.78E-03)	8.589e-07	0.000113375	6.83E-03 (2.36E-03)	0.00383344	0.506014
cg25343008	chr1	202470230	PPP1R12B	Body	Open Sea	Recent Use	6.48E-03 (1.50E-03)	1.51598e-05	0.00200109	6.76E-03 (2.50E-03)	0.00682939	0.90148
cg23314514	chr14	104852775			Open Sea	Recent Use	-5.13E-03 (1.23E-03)	3.15467e-05	0.00416416	-4.62E-03 (1.56E-03)	0.00314681	0.415378
cg09132256	chr16	84535908	KIAA1609	5'UTR	Shelf	Recent Use	9.27E-03 (3.09E-03)	0.00274713	0.362621	7.66E-03 (2.06E-03)	0.000204485	0.0269921
cg18211706	chr12	54867332	GTSF1	5'UTR	Open Sea	Recent Use	7.87E-03 (2.48E-03)	0.00150896	0.199183	6.78E-03 (1.94E-03)	0.000474983	0.0626978
cg15540553	chr11	64018643	PLCB3	TSS1500	Island	Recent Use	-1.23E-02 (3.56E-03)	0.000547245	0.0722363	-1.25E-02 (3.39E-03)	0.000232562	0.0306981
cg06969469	chr2	121554817	GLI2	TSS200	Open Sea	Recent Use	9.33E-03 (2.00E-03)	3.1266e-06	0.000412711	5.38E-03 (2.24E-03)	0.0161963	1
cg26924392	chr17	75238749			Open Sea	Recent Use	5.16E-03 (4.89E-03)	0.291901	1	1.25E-02 (2.24E-03)	2.34e-08	3.0888e-06
cg06815210	chr3	8844052			Open Sea	Recent Use	-8.56E-03 (2.65E-03)	0.00122897	0.162224	-9.44E-03 (3.03E-03)	0.00181426	0.239482
cg20299935	chr17	21795943			Open Sea	Recent Use	8.51E-03 (2.56E-03)	0.000873558	0.11531	6.28E-03 (2.16E-03)	0.00366629	0.48395
cg01443684	chr1	39314427	RRAGC	Body	Open Sea	Recent Use	1.33E-02 (3.63E-03)	0.000236707	0.0312454	1.06E-02 (2.93E-03)	0.000293374	0.0387253
cg21392402	chr14	91163691	TTC7B	Body	Open Sea	Recent Use	4.12E-03 (1.46E-03)	0.00489446	0.646069	5.82E-03 (1.98E-03)	0.0032708	0.431745
cg02646643	chr3	184026751	PSMD2	3'UTR	Open Sea	Recent Use	1.07E-02 (3.81E-03)	0.00512991	0.677148	1.06E-02 (2.36E-03)	6.5787e-06	0.000868388
cg16504439	chr4	20647245			Open Sea	Recent Use	-8.78E-03 (2.01E-03)	1.22686e-05	0.00161945	-5.68E-03 (2.19E-03)	0.00957771	1
cg12028375	chr3	66534318	LRIG1	Body	Open Sea	Recent Use	-5.19E-03 (1.90E-03)	0.00646491	0.853368	-5.93E-03 (1.52E-03)	0.000101493	0.0133971
cg02616769	chr3	22348099			Open Sea	Recent Use	-1.06E-02 (3.18E-03)	0.000853793	0.112701	-9.04E-03 (2.74E-03)	0.000973742	0.128534
cg17544636	chr17	30345789			Open Sea	Recent Use	1.01E-02 (4.76E-03)	0.0336871	1	1.25E-02 (2.68E-03)	3.0176e-06	0.000398323
cg11035992	chr17	7657473	RPL29P2	TSS200	Open Sea	Recent Use	7.79E-03 (1.67E-03)	2.9582e-06	0.000390482	5.71E-03 (2.20E-03)	0.00935897	1
cg27209861	chr1	6978798	CAMTA1	Body	Open Sea	Recent Use	4.39E-03 (9.63E-04)	5.1217e-06	0.000676064	2.91E-03 (1.24E-03)	0.0185506	1
cg09254142	chr1	25943891	MAN1C1	TSS200	Shore	Recent Use	-4.86E-03 (2.22E-03)	0.0286017	1	-6.78E-03 (1.52E-03)	8.0707e-06	0.00106533
cg16066871	chr10	133208486			Open Sea	Recent Use	-5.34E-03 (1.67E-03)	0.00138743	0.183141	-7.41E-03 (2.06E-03)	0.000325953	0.0430257
cg09393453	chr19	54224374	MIR517B	Body	Open Sea	Recent Use	5.76E-03 (2.90E-03)	0.0469482	1	6.18E-03 (1.23E-03)	4.848e-07	6.39936e-05
cg18319941	chr7	64894861			Open Sea	Recent Use	3.79E-02 (1.00E-02)	0.000149806	0.0197743	2.20E-02 (7.55E-03)	0.00356424	0.47048
cg20424400	chr12	110026737	MVK	Body	Open Sea	Recent Use	5.61E-03 (1.71E-03)	0.00102667	0.13552	6.33E-03 (1.72E-03)	0.00024006	0.031688
cg13552867	chr1	160053689	KCNJ9	5'UTR	Shore	Recent Use	-1.33E-02 (7.39E-03)	0.0723556	1	-2.08E-02 (4.38E-03)	2.0172e-06	0.00026627
cg07011775	chr10	72964759			Open Sea	Recent Use	-1.53E-02 (3.71E-03)	3.88576e-05	0.0051292	-7.88E-03 (2.17E-03)	0.000284888	0.0376052
cg23714123	chr10	60228239			Open Sea	Recent Use	5.63E-03 (1.49E-03)	0.000165603	0.0218596	4.28E-03 (1.42E-03)	0.00262536	0.346547
cg15412087	chr11	120085145	OAF	Body	Shelf	Recent Use	-6.91E-03 (1.68E-03)	3.72897e-05	0.00492224	-3.86E-03 (1.75E-03)	0.027104	1
cg01668099	chr11	130026798			Shelf	Recent Use	-4.90E-03 (1.35E-03)	0.000274124	0.0361843	-4.73E-03 (1.51E-03)	0.0017757	0.234393
cg21491555	chr22	19967786	ARVCF	Body	Island	Recent Use	8.09E-03 (2.19E-03)	0.00022926	0.0302623	7.56E-03 (2.77E-03)	0.00642844	0.848554
cg10620881	chr7	158280480	PTPRN2	Body	Shore	Recent Use	1.08E-02 (3.28E-03)	0.000989223	0.130577	7.16E-03 (2.84E-03)	0.0118072	1
cg13337507	chr18	3050831			Open Sea	Recent Use	1.05E-02 (3.70E-03)	0.00435735	0.57517	1.02E-02 (3.04E-03)	0.00078907	0.104157
cg25069772	chr6	12867139	PHACTR1	Body	Open Sea	Recent Use	-5.02E-03 (1.33E-03)	0.00016051	0.0211874	-2.14E-03 (1.07E-03)	0.0462792	1
cg08153621	chr19	53561441			Island	Recent Use	1.45E-02 (4.88E-03)	0.00288325	0.38059	1.11E-02 (4.30E-03)	0.0095424	1
cg04711836	chr17	39882259	HAP1	Body	Open Sea	Recent Use	-5.36E-03 (1.85E-03)	0.00379397	0.500804	-6.49E-03 (2.02E-03)	0.00129013	0.170297
cg20145687	chr3	16461636	RFTN1	Body	Open Sea	Recent Use	8.54E-03 (4.40E-03)	0.0521942	1	1.35E-02 (2.71E-03)	6.437e-07	8.49684e-05
cg16674248	chr22	46664402	TTC38	Body	Shore	Recent Use	1.72E-02 (3.93E-03)	1.14977e-05	0.0015177	4.97E-03 (2.21E-03)	0.024815	1
cg11588001	chr19	29704240	UQCRFS1	TSS200	Island	Recent Use	-1.48E-02 (2.88E-03)	2.831e-07	3.73692e-05	-5.58E-03 (2.76E-03)	0.0429228	1
cg02905178	chr4	7025904	TBC1D14	Body	Shore	Recent Use	8.90E-03 (2.37E-03)	0.000168768	0.0222774	5.64E-03 (2.23E-03)	0.0113004	1
cg24007376	chr13	51275033			Open Sea	Recent Use	7.59E-03 (1.53E-03)	7.009e-07	9.25188e-05	3.47E-03 (1.36E-03)	0.0106236	1
cg21234547	chr3	42236831	TRAK1	Body	Open Sea	Recent Use	8.29E-03 (2.11E-03)	8.33765e-05	0.0110057	7.61E-03 (2.33E-03)	0.00109378	0.144379
cg19580944	chr5	25569450			Open Sea	Recent Use	1.21E-02 (4.50E-03)	0.00701681	0.926219	1.18E-02 (2.39E-03)	6.856e-07	9.04992e-05
cg23916896	chr5	368804	AHRR	Body	Shore	Recent Use	-1.20E-02 (5.23E-03)	0.0216423	1	-2.19E-02 (6.01E-03)	0.000267547	0.0353163
cg09040721	chr6	41658881	TFEB	Body	Open Sea	Recent Use	8.46E-03 (2.20E-03)	0.000121887	0.0160891	8.47E-03 (3.52E-03)	0.0161983	1
cg14219071	chr2	48996041	STON1-GTF2A1L	Body	Open Sea	Recent Use	-1.48E-02 (3.81E-03)	0.000102284	0.0135015	-9.56E-03 (3.36E-03)	0.00449261	0.593024
cg10270293	chr16	4654666			Open Sea	Recent Use	1.14E-02 (3.58E-03)	0.00148641	0.196206	1.23E-02 (4.11E-03)	0.00284496	0.375534
cg10616121	chr11	111895341	DLAT	TSS200	Shore	Recent Use	-8.65E-03 (2.09E-03)	3.40952e-05	0.00450057	-7.51E-03 (2.12E-03)	0.000396814	0.0523795
cg05169160	chr2	178484487	TTC30A	TSS1500	Shore	Recent Use	4.92E-03 (1.93E-03)	0.0108419	1	5.69E-03 (1.47E-03)	0.000112484	0.0148479
cg03991223	chr1	55542588	USP24	Body	Open Sea	Recent Use	5.74E-03 (1.50E-03)	0.000131539	0.0173631	4.65E-03 (1.92E-03)	0.0153226	1
cg11175241	chr12	32669224	FGD4	5'UTR	Open Sea	Recent Use	-4.28E-03 (1.65E-03)	0.00938778	1	-6.66E-03 (1.92E-03)	0.000514746	0.0679465
cg21960184	chr11	113804386	HTR3B	Body	Open Sea	Recent Use	7.71E-03 (2.58E-03)	0.0028208	0.372346	8.13E-03 (2.30E-03)	0.00041105	0.0542586
cg17902007	chr13	101184847	A2LD1	5'UTR	Island	Recent Use	3.74E-03 (1.40E-03)	0.00752555	0.993372	5.25E-03 (1.42E-03)	0.000223172	0.0294587
cg13966609	chr11	117352730	DSCAML1	Body	Island	Recent Use	3.53E-03 (9.60E-04)	0.000231695	0.0305837	3.59E-03 (1.10E-03)	0.00113471	0.149782
cg11518846	chr6	133562246	EYA4	TSS1500	Island	Recent Use	-8.09E-03 (3.04E-03)	0.00785289	1	-1.01E-02 (2.73E-03)	0.000200777	0.0265026
cg00250546	chr5	22168242	CDH12	5'UTR	Open Sea	Recent Use	9.05E-03 (3.07E-03)	0.00316946	0.418368	9.82E-03 (2.73E-03)	0.000320867	0.0423544
cg02669268	chr2	209130300	PIKFYVE	TSS1500	Shore	Recent Use	-1.75E-02 (3.95E-03)	9.0591e-06	0.0011958	-7.45E-03 (2.82E-03)	0.00832104	1
cg06466031	chr19	37329448	ZNF790	TSS200	Island	Recent Use	2.05E-02 (5.18E-03)	7.61599e-05	0.0100531	1.12E-02 (4.55E-03)	0.0137477	1
cg24433156	chr22	36884483	FOXRED2	3'UTR	Open Sea	Recent Use	8.72E-03 (3.13E-03)	0.00528695	0.697877	1.30E-02 (3.03E-03)	1.81783e-05	0.00239954
cg04917373	chr1	231489252	C1orf124	3'UTR	Open Sea	Recent Use	6.97E-03 (2.07E-03)	0.000747326	0.098647	4.07E-03 (1.72E-03)	0.0178492	1
cg21495609	chr11	69080688			Open Sea	Recent Use	4.45E-03 (1.11E-03)	5.85248e-05	0.00772527	2.70E-03 (1.14E-03)	0.0174327	1
cg04831510	chr6	129250744	LAMA2	Body	Shore	Recent Use	6.79E-03 (2.07E-03)	0.00104546	0.138001	5.61E-03 (2.12E-03)	0.00812321	1
cg05922265	chr5	120097654			Open Sea	Recent Use	1.55E-02 (4.04E-03)	0.000117314	0.0154854	1.06E-02 (4.85E-03)	0.0285566	1
cg02703675	chr11	12159354	MICAL2	TSS1500	Open Sea	Recent Use	-3.53E-03 (1.29E-03)	0.00632557	0.834975	-5.98E-03 (1.75E-03)	0.000646196	0.0852978
cg18461093	chr12	78048039			Open Sea	Recent Use	4.83E-03 (1.49E-03)	0.00121896	0.160903	5.08E-03 (1.31E-03)	0.000100939	0.013324
cg18489009	chr19	46056723	OPA3	3'UTR	Shore	Recent Use	8.56E-03 (2.73E-03)	0.00171315	0.226136	8.60E-03 (2.35E-03)	0.000258693	0.0341474
cg05689028	chr11	118086808	AMICA1	5'UTR	Open Sea	Recent Use	-6.71E-03 (3.40E-03)	0.0484562	1	-8.02E-03 (1.72E-03)	2.958e-06	0.000390456
cg27055782	chr11	2397486	CD81	TSS1500	Shore	Recent Use	-7.00E-03 (1.91E-03)	0.000245946	0.0324648	-5.72E-03 (1.80E-03)	0.00144908	0.191279
cg24483247	chr4	5890411	CRMP1	Body	Island	Recent Use	1.46E-02 (4.33E-03)	0.000737717	0.0973787	1.39E-02 (4.26E-03)	0.0010903	0.14392
cg10138977	chr2	131421912			Open Sea	Recent Use	1.31E-02 (3.70E-03)	0.000412779	0.0544869	1.20E-02 (3.40E-03)	0.000397546	0.052476
cg03219908	chr5	172659512	NKX2-5	3'UTR	Island	Recent Use	1.53E-02 (4.81E-03)	0.00149561	0.19742	1.31E-02 (4.30E-03)	0.00234403	0.309412
cg21170085	chr9	137645730	COL5A1	Body	Open Sea	Recent Use	-7.50E-03 (3.61E-03)	0.0375155	1	-1.20E-02 (2.77E-03)	1.51633e-05	0.00200156
cg21447227	chr7	158656677	WDR60	Body	Island	Recent Use	-1.12E-02 (3.58E-03)	0.00181513	0.239597	-7.59E-03 (2.84E-03)	0.00748272	0.987719
cg24339197	chr12	121093625	CABP1	Body	Open Sea	Recent Use	-1.94E-02 (8.81E-03)	0.0280008	1	-1.99E-02 (5.19E-03)	0.000121404	0.0160254
cg09501516	chr1	163039155	RGS4	1stExon	Open Sea	Recent Use	1.47E-02 (4.17E-03)	0.000440973	0.0582084	1.06E-02 (4.26E-03)	0.0124742	1
cg05731136	chr11	122571799	UBASH3B	Body	Open Sea	Recent Use	-7.59E-03 (1.94E-03)	9.49633e-05	0.0125352	-4.82E-03 (1.57E-03)	0.00219506	0.289748
cg01947805	chr11	10906230			Open Sea	Recent Use	1.87E-02 (6.32E-03)	0.00313745	0.414144	1.38E-02 (3.65E-03)	0.000163424	0.021572
cg10260220	chr17	40811158	TUBG2	TSS200	Shore	Recent Use	-1.07E-02 (2.75E-03)	0.000108482	0.0143196	-4.99E-03 (2.79E-03)	0.0731242	1
cg10341310	chr8	66582206	MTFR1	Body	Open Sea	Recent Use	1.70E-02 (5.23E-03)	0.00110939	0.146439	9.33E-03 (2.78E-03)	0.000792986	0.104674
cg16960213	chr15	43432580	TMEM62	Body	Open Sea	Recent Use	1.06E-02 (4.33E-03)	0.0146107	1	1.27E-02 (3.42E-03)	0.000202855	0.0267768
cg15088912	chr13	48987465	LPAR6	1stExon	Open Sea	Recent Use	-1.31E-02 (3.74E-03)	0.000478293	0.0631347	-9.42E-03 (3.57E-03)	0.00842359	1
cg12992554	chr1	17046815	ESPNP	TSS200	Open Sea	Recent Use	4.46E-03 (1.64E-03)	0.00651091	0.85944	7.22E-03 (1.94E-03)	0.000204507	0.0269949
cg22124000	chr11	105115332			Open Sea	Recent Use	-9.79E-03 (2.80E-03)	0.000477262	0.0629986	-4.55E-03 (2.30E-03)	0.0484589	1
cg09959525	chr2	161133880	RBMS1	ExonBnd	Open Sea	Recent Use	1.67E-02 (5.51E-03)	0.00244897	0.323263	1.71E-02 (5.50E-03)	0.00190282	0.251172
cg10884287	chr9	140301662	EXD3	Body	Island	Recent Use	-9.34E-03 (4.67E-03)	0.0456313	1	-1.06E-02 (2.52E-03)	2.82833e-05	0.0037334
cg05575921	chr5	373378	AHRR	Body	Shore	Cumulative Use	-7.44E-02 (2.01E-02)	0.000218686	0.00349897	-6.84E-02 (1.30E-02)	1.472e-07	2.3552e-06
cg21161138	chr5	399360	AHRR	Body	Open Sea	Cumulative Use	-1.64E-02 (4.70E-03)	0.000492195	0.00787512	-2.63E-02 (4.99E-03)	1.303e-07	2.0848e-06
cg09040721	chr6	41658881	TFEB	Body	Open Sea	Cumulative Use	1.99E-02 (3.35E-03)	3e-09	4.8e-08	1.68E-02 (5.95E-03)	0.00464457	0.0743131
cg13552867	chr1	160053689	KCNJ9	5'UTR	Shore	Cumulative Use	-2.48E-02 (1.07E-02)	0.0207644	0.332231	-4.41E-02 (8.18E-03)	7.03e-08	1.1248e-06
cg09825346	chr1	161718614	DUSP12	TSS1500	Shore	Cumulative Use	1.72E-02 (3.06E-03)	1.8e-08	2.88e-07	1.30E-02 (5.17E-03)	0.0116302	0.186083
cg21263605	chr1	166818686	POGK	Body	Open Sea	Cumulative Use	1.45E-02 (4.47E-03)	0.00118223	0.0189156	8.42E-03 (3.30E-03)	0.0107538	0.172061
cg26003997	chr9	96395832	PHF2	Body	Open Sea	Cumulative Use	1.40E-02 (3.89E-03)	0.000327059	0.00523295	1.45E-02 (4.28E-03)	0.000718106	0.0114897
cg24976193	chr4	100685228			Open Sea	Cumulative Use	-2.06E-02 (4.31E-03)	1.6989e-06	2.71824e-05	-1.17E-02 (4.31E-03)	0.00656933	0.105109
cg00785657	chr19	35168593	ZNF302	1stExon	Island	Cumulative Use	1.72E-02 (3.19E-03)	7.14e-08	1.1424e-06	9.37E-03 (3.11E-03)	0.00259643	0.0415429
cg02646643	chr3	184026751	PSMD2	3'UTR	Open Sea	Cumulative Use	2.14E-02 (5.95E-03)	0.00032596	0.00521536	1.92E-02 (4.53E-03)	2.26279e-05	0.000362046
cg02978227	chr3	98292027			Open Sea	Cumulative Use	-2.17E-02 (4.72E-03)	4.2523e-06	6.80368e-05	-1.39E-02 (4.63E-03)	0.00257402	0.0411842
cg21352345	chr14	73129354	DPF3	3'UTR	Open Sea	Cumulative Use	1.34E-02 (4.77E-03)	0.00499377	0.0799003	1.98E-02 (4.49E-03)	9.7954e-06	0.000156726
cg03219908	chr5	172659512	NKX2-5	3'UTR	Island	Cumulative Use	3.14E-02 (8.04E-03)	9.34778e-05	0.00149564	2.38E-02 (7.93E-03)	0.00271879	0.0435007
cg12084925	chr6	33130696	COL11A2	3'UTR	Shore	Cumulative Use	1.08E-02 (4.30E-03)	0.011702	0.187231	1.61E-02 (3.70E-03)	1.33231e-05	0.00021317
cg15425280	chr4	158141492	GRIA2	TSS1500	Island	Cumulative Use	1.91E-02 (4.40E-03)	1.43036e-05	0.000228858	1.45E-02 (4.99E-03)	0.00378071	0.0604913
cg18461093	chr12	78048039			Open Sea	Cumulative Use	1.01E-02 (2.61E-03)	0.000116726	0.00186761	9.90E-03 (2.73E-03)	0.000292814	0.00468502

## Sheet: SuppTable9
Supplemental Table 9. Smoking Status-Specific Associations for Recent and Cumulative Marijuana Use at Y15
CpG	Chr	Position	Nearest Gene	Genomic Region	Relation to CpG Island	Marijuana Use	Nonsmokers			Former Smokers			Current Smokers
							β (SE)	P	Bonf. P	β (SE)	P	Bonf. P	β (SE)	P	Bonf. P
cg18110140	chr15	75350380			Open Sea	Recent Use	-1.50E-02 (3.11E-03)	1.5332e-06	3.37304e-05	-8.98E-03 (3.59E-03)	0.0123654	0.27204	-1.06E-02 (3.12E-03)	0.000651554	0.0143342
cg21171274	chr15	52539081	MYO5C	Body	Open Sea	Recent Use	-2.77E-03 (1.16E-03)	0.0172384	0.379245	-6.04E-03 (1.96E-03)	0.00211447	0.0465184	-4.14E-03 (8.16E-04)	3.942e-07	8.6724e-06
cg17218147	chr3	38995416	SCN11A	TSS1500	Open Sea	Recent Use	-4.83E-03 (1.68E-03)	0.00407033	0.0895473	-5.94E-03 (2.54E-03)	0.0193812	0.426386	-5.08E-03 (1.37E-03)	0.000197652	0.00434835
cg12438576	chr11	89232216	NOX4	5'UTR	Open Sea	Recent Use	6.63E-03 (2.70E-03)	0.0139751	0.307452	5.64E-03 (3.73E-03)	0.130799	1	1.04E-02 (2.44E-03)	2.06091e-05	0.0004534
cg15627771	chr2	192111084	MYO1B	5'UTR	Shore	Recent Use	-4.01E-03 (1.63E-03)	0.0140269	0.308593	-6.34E-03 (2.39E-03)	0.00795625	0.175038	-5.22E-03 (1.52E-03)	0.000571795	0.0125795
cg18880190	chr15	40399609	BMF	5'UTR	Shore	Recent Use	-4.76E-03 (1.58E-03)	0.00251947	0.0554284	-3.74E-03 (2.15E-03)	0.0820767	1	-4.88E-03 (1.38E-03)	0.000408678	0.00899092
cg19857151	chr1	235985454	LYST	Body	Open Sea	Recent Use	9.06E-03 (2.30E-03)	8.2702e-05	0.00181944	6.63E-03 (2.84E-03)	0.0194887	0.428751	3.60E-03 (1.37E-03)	0.00876265	0.192778
cg13444775	chr11	124546591	SIAE;SPA17	TSS1500	Shelf	Recent Use	-1.07E-02 (4.69E-03)	0.0230198	0.506436	-2.31E-02 (7.37E-03)	0.00174447	0.0383784	-9.87E-03 (3.84E-03)	0.0101525	0.223356
cg05575921	chr5	373378	AHRR	Body	Shore	Recent Use	-6.15E-02 (1.60E-02)	0.000119514	0.00262931	-5.11E-02 (1.44E-02)	0.000380129	0.00836285	-1.70E-02 (8.21E-03)	0.0385546	0.848202
cg15607642	chr6	107391589	BEND3	Body	Shore	Recent Use	6.86E-03 (2.04E-03)	0.000786391	0.0173006	7.07E-03 (2.87E-03)	0.0136401	0.300081	5.20E-03 (1.67E-03)	0.00183208	0.0403058
cg10721491	chr19	29581832			Shelf	Recent Use	-5.87E-03 (1.75E-03)	0.00078726	0.0173197	-6.80E-03 (4.51E-03)	0.131808	1	-3.84E-03 (1.45E-03)	0.00796176	0.175159
cg05161803	chr6	12393258	RNU6-48P	TSS1500	Open Sea	Recent Use	-6.90E-03 (2.26E-03)	0.00226605	0.0498531	-1.10E-02 (5.78E-03)	0.0559756	1	-4.48E-03 (1.80E-03)	0.0128008	0.281619
cg05086879	chr22	39861490	MGAT3	5'UTR	Open Sea	Recent Use	-1.34E-02 (3.31E-03)	5.11462e-05	0.00112522	-1.02E-02 (5.35E-03)	0.0552669	1	-1.07E-02 (3.58E-03)	0.00273701	0.0602143
cg06300152	chr1	150268771	MRPS21	Body	Shelf	Recent Use	5.90E-03 (1.93E-03)	0.00221402	0.0487085	8.00E-03 (2.32E-03)	0.000560976	0.0123415	4.78E-03 (2.12E-03)	0.0244138	0.537104
cg19856593	chr21	38064236			Shore	Recent Use	-8.36E-03 (2.62E-03)	0.00141598	0.0311516	-2.36E-03 (3.09E-03)	0.443784	1	-7.37E-03 (2.17E-03)	0.00066435	0.0146157
cg05615552	chr6	33160952	COL11A2	TSS1500	Island	Recent Use	1.39E-03 (1.95E-03)	0.476069	1	8.50E-03 (2.02E-03)	2.58828e-05	0.000569422	6.47E-03 (2.05E-03)	0.00154702	0.0340345
cg16947168	chr3	62651287	CADPS	Body	Open Sea	Recent Use	-9.11E-03 (2.97E-03)	0.00211508	0.0465318	-1.23E-02 (4.63E-03)	0.00796994	0.175339	-8.51E-03 (2.83E-03)	0.00259751	0.0571452
cg05009104	chr7	45002980	MYO1G	Body	Shore	Recent Use	1.94E-02 (4.73E-03)	4.15568e-05	0.00091425	9.24E-03 (7.43E-03)	0.213413	1	1.24E-02 (4.23E-03)	0.00337496	0.0742492
cg15802887	chr1	32420496			Open Sea	Recent Use	-3.47E-03 (1.27E-03)	0.0063136	0.138899	-5.44E-03 (1.25E-03)	1.38571e-05	0.000304856	-2.84E-03 (8.59E-04)	0.000922972	0.0203054
cg25189904	chr1	68299493	GNG12	TSS1500	Shore	Recent Use	-1.71E-02 (5.37E-03)	0.00143685	0.0316107	-2.44E-02 (7.70E-03)	0.00152464	0.033542	-1.18E-02 (5.53E-03)	0.033438	0.735637
cg23932689	chr12	110173904	FAM222A	5'UTR	Open Sea	Recent Use	7.81E-03 (1.93E-03)	5.17491e-05	0.00113848	3.10E-03 (3.50E-03)	0.374812	1	5.46E-03 (1.84E-03)	0.00307388	0.0676254
cg12475321	chr3	34711184			Open Sea	Recent Use	-8.59E-03 (2.46E-03)	0.000474168	0.0104317	-1.23E-02 (3.07E-03)	6.24892e-05	0.00137476	-3.26E-03 (2.03E-03)	0.108788	1
cg05575921	chr5	373378	AHRR	Body	Shore	Cumulative Use	-1.37E-01 (3.13E-02)	1.1451e-05	0.000354981	-1.03E-01 (2.36E-02)	1.29251e-05	0.000400678	-4.74E-02 (2.07E-02)	0.0221269	0.685933
cg18880190	chr15	40399609	BMF	5'UTR	Shore	Cumulative Use	-1.21E-02 (3.69E-03)	0.00104632	0.0324358	-8.77E-03 (5.73E-03)	0.125831	1	-1.25E-02 (4.15E-03)	0.00255267	0.0791329
cg07064251	chr2	43948676	PLEKHH2	Body	Open Sea	Cumulative Use	1.27E-02 (4.22E-03)	0.00263005	0.0815316	1.64E-02 (6.04E-03)	0.00661824	0.205165	1.17E-02 (3.48E-03)	0.000812723	0.0251944
cg23932689	chr12	110173904	FAM222A	5'UTR	Open Sea	Cumulative Use	1.75E-02 (4.67E-03)	0.000182292	0.00565106	7.95E-03 (6.35E-03)	0.210178	1	1.55E-02 (4.98E-03)	0.0017913	0.0555304
cg25189904	chr1	68299493	GNG12	TSS1500	Shore	Cumulative Use	-3.68E-02 (1.30E-02)	0.00466286	0.144549	-5.05E-02 (1.62E-02)	0.00186132	0.0577009	-3.19E-02 (1.33E-02)	0.0160102	0.496317
cg13179084	chr12	116638602	MED13L	Body	Open Sea	Cumulative Use	1.64E-02 (4.89E-03)	0.000776966	0.024086	2.03E-02 (5.02E-03)	5.14931e-05	0.00159629	8.96E-03 (3.81E-03)	0.0186999	0.579696
cg06326914	chr15	35280920	ZNF770	TSS1500	Shore	Cumulative Use	1.44E-02 (6.36E-03)	0.0231979	0.719134	2.08E-02 (8.93E-03)	0.0196552	0.609311	2.19E-02 (4.80E-03)	5.2285e-06	0.000162083
cg12510044	chr22	22115473	MAPK1	3'UTR	Open Sea	Cumulative Use	-9.78E-03 (4.93E-03)	0.0472957	1	-1.33E-02 (7.98E-03)	0.0946889	1	-1.93E-02 (3.99E-03)	1.2356e-06	3.83036e-05
cg18387338	chr7	26591438			Open Sea	Cumulative Use	-2.21E-02 (5.83E-03)	0.000148932	0.0046169	-2.35E-02 (7.89E-03)	0.00295396	0.0915729	-1.34E-02 (6.37E-03)	0.0348249	1
cg04742550	chr16	31366429	ITGAX	TSS200	Open Sea	Cumulative Use	-2.29E-02 (1.02E-02)	0.0243587	0.755119	-5.93E-02 (9.36E-03)	2e-10	6.2e-09	-2.18E-02 (9.77E-03)	0.0257913	0.799531
cg09706133	chr15	68659758	ITGA11	Body	Open Sea	Cumulative Use	-1.06E-02 (3.20E-03)	0.000898687	0.0278593	-1.40E-02 (3.79E-03)	0.000218335	0.00676837	-7.73E-03 (3.03E-03)	0.0106868	0.33129
cg26764244	chr1	68299511	GNG12	TSS1500	Shore	Cumulative Use	-4.15E-02 (1.38E-02)	0.00261521	0.0810715	-5.82E-02 (1.66E-02)	0.000443566	0.0137505	-3.82E-02 (1.99E-02)	0.0545887	1
cg09935388	chr1	92947588	GFI1	Body	Island	Cumulative Use	-4.91E-02 (1.35E-02)	0.000271313	0.0084107	-4.45E-02 (1.31E-02)	0.000704861	0.0218507	-2.94E-02 (1.66E-02)	0.0773246	1
cg05009104	chr7	45002980	MYO1G	Body	Shore	Cumulative Use	5.13E-02 (1.04E-02)	9.039e-07	2.80209e-05	3.44E-02 (1.83E-02)	0.0602204	1	2.65E-02 (1.17E-02)	0.0235519	0.73011
cg03905975	chr8	128637338			Open Sea	Cumulative Use	-2.69E-02 (6.77E-03)	6.98027e-05	0.00216388	-2.15E-02 (7.86E-03)	0.00622753	0.193054	-1.26E-02 (5.81E-03)	0.029899	0.926868
cg04864586	chr4	99853099	EIF4E	TSS1500	Shelf	Cumulative Use	1.27E-02 (4.35E-03)	0.00345576	0.107129	1.13E-02 (5.25E-03)	0.0309119	0.958268	1.21E-02 (4.60E-03)	0.00851443	0.263947
cg03802952	chr2	45411645	LINC01121	Body	Open Sea	Cumulative Use	-6.12E-03 (8.30E-03)	0.460975	1	-2.84E-02 (9.77E-03)	0.00368091	0.114108	-2.09E-02 (5.88E-03)	0.000376911	0.0116843
cg01212491	chr10	75587308	CAMK2G	Body	Open Sea	Cumulative Use	-1.41E-02 (5.15E-03)	0.00628313	0.194777	-2.03E-02 (5.58E-03)	0.000278068	0.00862012	-1.85E-02 (5.36E-03)	0.000569081	0.0176415
cg15607642	chr6	107391589	BEND3	Body	Shore	Cumulative Use	1.10E-02 (5.18E-03)	0.0336864	1	1.13E-02 (5.47E-03)	0.0394202	1	1.75E-02 (4.34E-03)	5.22858e-05	0.00162086
cg27168438	chr3	28283068	CMC1	TSS200	Island	Cumulative Use	1.33E-02 (4.63E-03)	0.00404271	0.125324	1.61E-02 (7.14E-03)	0.0236977	0.734629	1.05E-02 (4.41E-03)	0.0171206	0.53074
cg12211703	chr3	42204097	TRAK1	Body	Open Sea	Cumulative Use	6.13E-03 (3.05E-03)	0.0446229	1	5.12E-03 (6.35E-03)	0.419886	1	1.15E-02 (3.14E-03)	0.000260722	0.00808239
cg16736717	chr7	54397759	LINC01445	TSS1500	Open Sea	Cumulative Use	1.06E-02 (6.13E-03)	0.0841847	1	1.87E-02 (5.94E-03)	0.00164956	0.0511363	2.15E-02 (6.79E-03)	0.00154157	0.0477888
cg14374923	chr6	33145955	COL11A2	Body	Open Sea	Cumulative Use	-1.58E-02 (5.56E-03)	0.00459418	0.142419	-1.37E-02 (4.24E-03)	0.00118918	0.0368647	-1.12E-02 (6.36E-03)	0.0779992	1
cg05998850	chr2	216981107	XRCC5	Body	Open Sea	Cumulative Use	1.45E-02 (7.75E-03)	0.061982	1	2.74E-02 (4.38E-03)	4e-10	1.24e-08	6.09E-03 (5.99E-03)	0.308839	1
cg19089201	chr7	45002287	MYO1G	3'UTR	Island	Cumulative Use	7.49E-02 (2.93E-02)	0.0106841	0.331207	1.20E-01 (3.13E-02)	0.00013091	0.0040582	5.59E-02 (2.49E-02)	0.0248659	0.770843
cg20207973	chr22	38506712	BAIAP2L2	TSS200	Open Sea	Cumulative Use	-9.69E-03 (5.53E-03)	0.0798612	1	-1.49E-02 (7.12E-03)	0.0362711	1	-1.50E-02 (6.40E-03)	0.0187341	0.580757
cg26286198	chr20	48812659			Shelf	Cumulative Use	-6.99E-03 (4.07E-03)	0.0863893	1	-1.24E-02 (5.28E-03)	0.0185557	0.575226	-1.19E-02 (2.95E-03)	5.16947e-05	0.00160254
cg13810485	chr5	58440035	PDE4D	Body	Open Sea	Cumulative Use	-1.35E-02 (7.45E-03)	0.0698866	1	-2.00E-02 (6.66E-03)	0.00268731	0.0833067	-1.49E-02 (4.77E-03)	0.00184068	0.057061
cg06681167	chr2	67828263			Open Sea	Cumulative Use	-6.91E-03 (3.75E-03)	0.0653312	1	-1.11E-02 (5.89E-03)	0.0592974	1	-1.72E-02 (3.14E-03)	4.33e-08	1.3423e-06
cg18110140	chr15	75350380			Open Sea	Cumulative Use	-2.88E-02 (7.73E-03)	0.00019852	0.00615413	-1.78E-02 (7.14E-03)	0.0127616	0.39561	-1.93E-02 (1.03E-02)	0.0603029	1
cg21852554	chr7	75993585			Open Sea	Cumulative Use	-1.08E-02 (3.33E-03)	0.00113167	0.0350817	-1.41E-02 (6.74E-03)	0.0359724	1	-7.88E-03 (4.43E-03)	0.0754676	1

[truncated: 10 more sheets: SuppTable10, SuppTable11, SuppTable12, SuppTable13, SuppTable14, SuppTable15, SuppTable16, SuppTable17, SuppTable18, SuppTable19]
